1 ***Ab initio* modelling of an essential mammalian protein: Transcription Termination**  
2 **Factor 1 (TTF1)**

3 Kumud Tiwari<sup>a1</sup>, Aditi Gangopadhyay<sup>b1</sup>, Gajender Singh<sup>a</sup>, Samarendra Kumar Singh<sup>a\*</sup>

4 <sup>a</sup> School of Biotechnology, Institute of Science, Banaras Hindu University,  
5 Varanasi, Uttar Pradesh 221005, India

6 <sup>b</sup> Department of Chemical Technology, University of Calcutta, Kolkata, West  
7 Bengal 700009, India

8 <sup>1</sup>These authors contributed equally

9 \*Corresponding author: Samarendra Kumar Singh

10  
11 Cell Cycle and Cancer Laboratory, School of Biotechnology, Institute of Science, Banaras  
12 Hindu University, Varanasi, Uttar Pradesh 221005, India.

13  
14 Phone: +91-8009561887, +91-8707400665

15  
16 E-mail: [samarendra.singh@bhu.ac.in](mailto:samarendra.singh@bhu.ac.in); [biotech3@rediffmail.com](mailto:biotech3@rediffmail.com)  
17

18

19

20

21

22 **Abstract**

23 Transcription Termination Factor 1 (TTF1) is an essential mammalian protein that regulates  
24 cellular transcription, replication fork arrest, DNA damage repair, chromatin remodelling etc.  
25 TTF1 interacts with numerous cellular proteins to regulate various cellular phenomena, and  
26 plays a crucial role in maintaining normal cellular physiology, dysregulation of which has  
27 been reported towards cancerous transformation of the cells. However, despite its key role in  
28 cellular physiology, the complete structure of human TTF1 has not been elucidated to date,  
29 either experimentally or computationally. Hence, understanding the structure of human TTF1  
30 becomes highly important for studying its functions and interactions with other cellular  
31 factors. Therefore, the aim of this study was to construct the complete structure of human  
32 TTF1 protein, using molecular modelling approaches. Owing to the lack of suitable  
33 homologues in the PDB, the complete structure of human TTF1 was constructed using *ab*  
34 *initio* modelling. The structural stability was determined using molecular dynamics (MD)  
35 simulations in explicit solvent, and trajectory analyses. The representative structure of human  
36 TTF1 was obtained by trajectory clustering, and the central residues were determined by  
37 centrality analyses of the residue interaction network of TTF1. Two residue clusters, in the  
38 oligomerisation domain and C-terminal domain, were determined to be central to the  
39 structural stability of human TTF1. To the best of our knowledge, this study is the first to  
40 report the complete structure of human TTF1, and the results obtained herein will provide  
41 structural insights for future research in cancer biology and related studies.

42 **Keywords:** Transcription termination, DNA binding, *ab initio* modelling, molecular  
43 dynamics simulation, network analysis, residue interaction network

## 44 **Author Summary**

45 The transcription termination factor 1 (TTF1) is an essential multifunctional mammalian  
46 protein which plays important role in regulating important cellular process like transcription,  
47 replication, DNA damage repair, chromatin remodelling etc. and its dysregulation leads to  
48 various cancers. Despite its being such an important factor, the complete structure of human  
49 TTF1 has not been determined to date, either using experimental techniques or  
50 computationally. Therefore, the aim of this study was to construct the complete structure of  
51 human TTF1 using computational modelling. In this study the complete structure of human  
52 TTF1 was constructed by *ab initio* modelling using iTasser. The stability of this model was  
53 determined by 200 ns molecular dynamics (MD) simulations. The representative  
54 conformation of human TTF1 was further determined by clustering the simulation trajectory  
55 and the residues that are central to the stability of this structure were identified. The results  
56 demonstrate the presence of two residue clusters in human TTF1, one in the oligomerisation  
57 domain and other in the C-terminal domain, which were found to be crucial for the structural  
58 stability of this protein. Hence, the results of this study will aid future studies in this field  
59 towards engineering this important protein for further biochemistry and cell biology research.

## 60 **1. Introduction**

61 Ribosomes are essential cellular organelles that partake in protein synthesis in both  
62 prokaryotes and eukaryotes. Ribosomes are comprised of ribosomal proteins and ribosomal  
63 RNA (rRNA), which is encoded by ribosomal DNA (rDNA), and serves as the catalytic  
64 subunit of the protein translation machinery. Eukaryotic rDNA is distributed in clusters of  
65 ~300-400 copies at both ends of the respective chromosomes (acrocentric chromosomes: 13,

66 14, 15, 21, and 22). These tandem repeats of rDNA copies create dense chromosomal regions  
67 called **Nucleolar Organizer Regions (NORs)** which consists of a non-transcribed spacer  
68 region flanked by pre-RNA coding regions. Of the total RNA that is transcribed, 80%  
69 consists of rRNAs [1,2]. Both the initiation and termination of rDNA transcription is  
70 mediated by a transcriptional regulator called Transcription Termination Factor 1 (TTF1),  
71 which is an essential protein in mammalian cells. The gene encoding TTF1 is located on  
72 **9q34.13**, in the long arm of chromosome 9. Transcription Termination Factor 1 protein  
73 (TTF1p) binds to DNA elements known as Sal box, located upstream and downstream of the  
74 rDNA gene repeats. In mammalian cells, the Sal box element consists of a *SalI* restriction  
75 site within the 11 bp sequence, **GGGTCGACCAG** [3]. Following its discovery as a  
76 transcription regulator, subsequent studies demonstrated that TTF1 is involved in polar  
77 replication fork arrest and also acts as a chromatin remodelling factor [4,5]. Current findings  
78 demonstrate that TTF1p interacts with various DNA damage sensing proteins, including  
79 Cockayne Syndrome B (CSB) [6], Mouse Double Minute 2 (MDM2) [7] and tumor  
80 suppressor Alternative Reading Frame (ARF) [8] protein, but the mechanism and exact roles  
81 of TTF1p remains to be identified to date. The overexpression of TTF1 has been correlated in  
82 various tumours, which indicates that owing to tumor hyperproliferation, TTF1 is required  
83 in higher quantities to meet the higher rate of ribosome biogenesis in tumor cells [9–11]. The  
84 TTF1 protein has several other unidentified roles, as it appears to interact with various other  
85 factors necessary for regulating a wide variety of physiological phenomena in cells. TTF1 is  
86 truly a multifunctional protein, and hence, it becomes important to characterise the numerous  
87 unidentified roles of this protein in cellular physiology both in healthy and cancerous cells.

88 TTF1p has distinct functional domains, including an N-terminal regulatory domain  
89 (NRD), which also is responsible for the oligomerisation of TTF1 [12]. It has been shown  
90 that due to its oligomerisation property, TTF1p can loop the ends of rDNA together, thereby  
91 placing the promoter and terminator regions in proximity to efficiently recycle the  
92 transcription machinery, and this model is known as the “ribomotor” model [13].  
93 Furthermore, TTF1 has a functional central domain and a C-terminal domain, which is  
94 essential for the activation and termination of Pol I-mediated transcription on a nucleosomal  
95 rDNA template [14]. The central domain has the highly conserved DNA binding myb/SANT-  
96 like domain which has strong homology with the DNA binding domain of Reb1 protein of  
97 *Schizosaccharomyces pombe*, and proto-oncoprotein c-Myb [15,16].

98 The only crystal structure of its yeast homolog protein, RNA Polymerase I enhancer  
99 binding protein (Reb1p) [17], bound to DNA, was solved to atomic resolution by our group  
100 [15]. The structure clearly shows an N-terminal regulatory domain which is also known as  
101 the dimerization domain, a central DNA-binding domain, and the C-terminal transcriptional  
102 terminator domain. Using various mutants, it was demonstrated that the mere binding of  
103 DNA to Reb1p is not sufficient for terminating transcription. Further it was shown that the  
104 interaction of Reb1p with Replication Protein A (RPA), via the C-terminal domain of Reb1p,  
105 is an essential requirement for effective transcriptional termination. The interaction with RPA  
106 induces an allosteric change which is necessary for stopping the movement of RNA  
107 polymerase I. Also, the domain of Reb1p which binds to DNA was identified to atomic  
108 resolution and the residues involved in protein-DNA contacts were identified. This region  
109 consists of two myb-associated domains (mybAD1 and mybAD2) and two Myb repeats

110 (mybR1 and mybR2). The helices involved in this region make contact with DNA at various  
111 residues [17].

112 TTF1 is an essential cellular protein owing to its numerous roles in several vital  
113 cellular functions, which are necessary for maintaining healthy cellular physiology.  
114 Understanding the structure of TTF1 would provide insights into the mechanistic aspect of  
115 its function. To date, there are no experimentally-determined structures or *in silico* models  
116 of TTF1. Our lab is involved in purifying and physically solving the structure of this protein.  
117 So far, crystallization trials have proved to be unsuccessful, and we are therefore attempting  
118 cryo-EM studies as well. Alternatively, computational modelling studies on this essential  
119 protein will provide a better understanding so that we can engineer the protein for future  
120 studies.

121 In the absence of experimentally-derived structures, homology modelling serves as a  
122 reliable method for the construction of protein structures. However, the reliability of the  
123 protein model depends on various factors, including the sequence identity between the  
124 template and target proteins. When the template-target identity falls below 30%, known as  
125 the twilight zone, the protein structure needs to be constructed by threading or *ab initio*  
126 methods [18]. This is due to the fact that below the twilight zone, the evolutionary relatedness  
127 between the template and target is doubtful, and the confidence of the prediction is low [19].  
128 The worldwide experiment for protein structure prediction, Critical Assessment of protein  
129 Structure Prediction (CASP), ranked the iTasser (iterative threading assembly refinement)  
130 server as the best tool for *ab initio* protein modelling. In the latest CASP14 experiment  
131 conducted in 2020, the iTasser server (Zhang server) ranked the best among 47 groups

132 [20,21]. The iTasser server also ranked best in the previous CASP7, CASP8, CASP9,  
133 CASP10, CASP11, CASP12, and CASP13 experiments [22]. In the CASP9 experiments in  
134 2010, the iTasser server was predicted to the best tool for protein function prediction [21]. In  
135 this study, the structure of the TTF1 protein was constructed by molecular modelling, using  
136 the iTasser server. The predicted models were validated and the structure was subjected to  
137 molecular dynamics (MD) simulations for 200 ns for studying the structural stability of  
138 TTF1, and determining the most stable conformation of the protein. Our study aimed to  
139 predict the structure of TTF1, which is an essential protein, using computational modelling.  
140 The results of our study will prove to be important for understanding the structural,  
141 functional, and therapeutic role of this essential protein.

## 142 **2. Results**

### 143 **2.1 Sequence-based analyses**

144 The results of sequence-based analysis with ProtParam showed that TTF1 is an unstable  
145 hydrophilic protein, as revealed by an instability index of 51.13 and grand average of  
146 hydrophobicity (GRAVY) of -0.939. This was corroborated by the results of disorder  
147 prediction, which showed that more than 50% of the residues of TTF1 are disordered (Fig  
148 1). The results of disorder prediction further revealed that residues 1-3, 689-696, 700-701,  
149 709, and 903-905 were disordered and had protein binding properties (S1 Fig). The  
150 physicochemical properties predicted by ProtParam and anticipation of disulphide bond (S-  
151 S) pattern by CYS REC tool are enlisted in Table 1.

152 **Table 1: Physicochemical properties of TTF1, as determined with ProtParam.**

| Physicochemical Properties                                     | Values                                                                                  |
|----------------------------------------------------------------|-----------------------------------------------------------------------------------------|
| Number of residues                                             | 905                                                                                     |
| Molecular formula                                              | C <sub>4512</sub> H <sub>7282</sub> N <sub>1302</sub> O <sub>1399</sub> S <sub>28</sub> |
| Molecular weight                                               | 103 kDa                                                                                 |
| Theoretical pI                                                 | 9.41                                                                                    |
| Instability index                                              | 51.13                                                                                   |
| Aliphatic index                                                | 65.09                                                                                   |
| Total number of negatively charged residues (D+E)              | 135                                                                                     |
| Total number of positively charged residues (R+K)              | 171                                                                                     |
| Extinction coefficient                                         | 96760                                                                                   |
| Grand average of hydrophobicity (GRAVY)                        | -0.939                                                                                  |
| Estimated half-life (mammalian reticulocyte, <i>in vitro</i> ) | 30 hours                                                                                |
| S-S Bond (predicted)                                           | 22-737, 73-887, 445-892                                                                 |

153

154 **Fig 1:** Graphical representation of the disordered regions of the human TTF1 protein.  
155 Residues with disorder score  $\geq 0.5$  (represented by the horizontal red line) were considered  
156 to be disordered.

## 157 **2.2 *Ab initio* modelling and structural validation of TTF1**

158 The results of template search using BLASTp against the PDB revealed that the highest  
159 target-template coverage was 4%, which was well below the twilight zone for homology  
160 modelling [23]. Therefore, the structure of human TTF1 could not be modelled using the



161 template-based methods in comparative modelling. The complete structure of human TTF1p  
162 was therefore modelled using *ab initio* methods, using the iTasser server. The confidence of  
163 the models predicted by iTasser are indicated by the C-score, which is a confidence score  
164 that provides a measure of the quality of the models generated by iTasser. The C-scores range  
165 between -5 and 2, with higher values indicating predictions of higher confidence, while lower  
166 values of C-score indicate predictions of lower confidence [20]. In this study, the model with  
167 the highest C-score of -0.60 was selected for subsequent analyses. This model was further  
168 minimised using Yasara, and the energy minimised structure was validated using ProSA  
169 [24,25]. The results of ProSA validation revealed that the structure of TTF1 was comparable  
170 to structures of similar size in the PDB, which had been determined using X-ray  
171 crystallography (Fig 2A). Analysis of the Ramachandran plot with Procheck revealed that  
172 only 1.0% of the residues were in the disallowed regions of the plot, while 82.9% and 14.1%  
173 of the residues were in the most favoured and additional allowed regions, respectively (Fig  
174 2B).

175 **Fig 2:** Structural validation of the energy minimised model of TTF1 using **A)** ProSA and **B)**  
176 Ramachandran plot analysis with Procheck.

### 177 **2.3. Functional validation of TTF1**

178 The results of analysis with TM-align revealed that the model of TTF1 generated by iTasser  
179 (Fig 3) was structurally most similar to cas13b (PDB ID: 6AAY), which is an RNA-binding  
180 protein from *Bergeyella zoohelcum* with RNase activity [26]. The human TTF1 protein is a  
181 DNA-binding protein that plays an important role in transcriptional termination. The TM-  
182 score of the alignment was 0.960, indicating correct topology, and the RMSD between the

183 generated model of TTF1 and cas13b was 2.29 Å, indicating high structural similarity  
184 between the two proteins. The structural similarity between TTF1 and cas13b indicated that  
185 the model of TTF1 obtained herein, possesses potential nucleic acid binding properties,  
186 similar to cas13b.

187 **Fig 3:** The structure of TTF1 constructed by *ab initio* modelling is depicted in light blue  
188 ribbon representation, and the structure obtained after minimisation with Yasara is depicted  
189 in dark blue ribbon representation.

190 The results of ligand binding analyses with COFACTOR and COACH revealed that residues  
191 620-626 of the TTF1 model have potential binding property to the ligand  
192 phosphoaminophosphonic acid-adenylate ester (ANP). ANP is a non-hydrolysable analogue  
193 of ATP, and comprises triphosphate, adenine, and ribose sugar moieties, similar to the  
194 composition of DNA. This indicated that the model of TTF1 predicted using iTasser has  
195 potential nucleic acid binding properties, and logically relates to the DNA-binding properties  
196 of TTF1 reported in literature and also been validated in our lab using the purified TTF1  
197 protein [3]. The ligand binding properties of the model of TTF1 were predicted to be most  
198 similar to those of the recombinase A protein of *Escherichia coli* (PDB ID: 3CMV), which  
199 possesses single-stranded DNA binding properties. These results indicated that the model of  
200 TTF1 possesses potential DNA binding properties, in agreement with the reports in existing  
201 literature and our experimental data (not shown here). The results of CD analyses revealed  
202 that residues 621-677 of TTF1 comprises the Myb-like DNA binding domain of TTF1 (pfam  
203 accession number: 13921) (S 2 Fig). The results of sequence-based CD analysis of TTF1  
204 corroborated with the results of structure-based ligand binding site prediction by

205 COFACTOR and COACH, further validating the DNA-binding potential, and thus the  
206 functional potential of the model of TTF1 constructed using iTasser. Furthermore, the  
207 residues with ANP-binding properties mapped to the DNA-binding domain of TTF1,  
208 implying the potential nucleotide binding properties of the structure of TTF1 generated by  
209 iTasser.

210 The results of consensus-based GO prediction revealed that the molecular function of the  
211 TTF1 protein model was associated with GO terms GO:0035639 (purine ribonucleoside  
212 triphosphate binding), GO:0032559 (adenyl ribonucleotide binding), and GO:0043167 (ion  
213 binding), with GO scores of 0.40, 0.40, and 0.39, respectively. These results further  
214 confirmed the nucleotide binding properties of the structure of TTF1 obtained with iTasser.  
215 The results of functional validation thus implied that the TTF1 model obtained using *ab initio*  
216 modelling has potential nucleic acid-binding properties, and agrees with the data reported in  
217 literature and observed in our lab.

#### 218 **2.4. Trajectory analyses**

219 The structural model of TTF1 thus obtained by *ab initio* modelling was subjected to 200 ns  
220 MD simulations for investigating the structural stability and determining any possible  
221 conformational changes in TTF1. Trajectory visualisation revealed that the protein stabilised  
222 after 20 ns and remained stable thereafter. This was further observed in the values of root  
223 mean square deviation RMSD, which became steady after 20 ns (Fig 4). As depicted in the  
224 Fig 4A, the values of RMSD became increasingly steady after 100 ns, and remained steady  
225 thereafter, with fluctuations in the RMSD values being in the range of 1-1.5 Å. This indicated  
226 that the system had reached equilibrium after 100 ns and remained stable thereafter. This was

227 further corroborated by the values of RoG (Fig 4B), which remained steady after 100 ns. The  
228 RoG is an indicator of structural compactness, and fluctuations in the values of RoG indicate  
229 protein unfolding. The fact that the values of RoG became steady after 100 ns indicated that  
230 the structure of TTF1 was stable and compact during the production run. Analysis of the  
231 values of RMSF revealed that some residues had higher flexibility, as indicated by the RMSF  
232 values, which were higher than 1.5 Å. The higher flexibility of these residues could be  
233 attributed to the fact that these residues mapped to the disordered regions predicted using  
234 DisoPred (Fig 4C).

235 **Fig 4:** Graphical representation of the values of **A)** RMSD and **B)** RoG of the protein  
236 backbone throughout the trajectory. **C)** Comparison of the average RMSF values and disorder  
237 scores of TTF1. The oligomerisation domain (residues 1-320), Myb domain 1 (residues 612-  
238 660), Myb domain 2 (residues 661-745), and chromatin remodelling region (residues 323-  
239 445) are indicated by blue, yellow, red, and green rectangles, respectively.

## 240 **2.5. Representative structure of TTF1**

241 The trajectory was clustered using Chimera v1.14, and the representative frame of the most  
242 populated cluster was selected as the representative conformation of TTF1 (Fig 5A, refer to  
243 the supplementary for coordinate file). The oligomerisation domain (residues 1-320), Myb  
244 domain 1 (residues 612-660), Myb domain 2 (residues 661-745), and chromatin remodelling  
245 region (residues 323-445,) [5,12,16] were mapped to the complete structure of TTF1 obtained  
246 herein (Fig 5B).

247 **Fig 5: A)** Ribbon and **B)** Surface representation of the representative structure of TTF1  
248 obtained by trajectory clustering. The oligomerisation domain, Myb domain 1, Myb domain  
249 2, and chromatin remodelling region are represented in blue, yellow, red, and green,  
250 respectively.

## 251 **2.6. Centrality analyses**

252 The RINs of the representative structure of TTF1 was determined using Cytoscape v3.8.2  
253 (Fig 6), and the central residues were identified using the RINspector plugin, based on the  
254 RCA Z-scores. In the RIN, the nodes indicate the residues, while the edges represent the  
255 intra-residue interactions. Residues with RCA Z-scores  $\geq 2$  were considered to be central to  
256 the structural stability of the protein. As depicted in Fig 6, the residues with Z-scores  $\geq 2$  are  
257 coloured in yellow, and those with Z-scores  $\geq 2$  are represented in red. The bigger nodes  
258 indicate residues with higher values of Z-scores. The RIN revealed two interaction clusters,  
259 with one cluster being located in the oligomerisation domain of TTF1, and the other being  
260 located towards the C-terminal region of the protein (Fig 6A and 6B). The Z-scores of the  
261 residues in the interaction cluster in the oligomerisation domain were higher than those of  
262 the residues in the C-terminal domain, indicating that the interaction cluster in the  
263 oligomerisation domain plays a more crucial role in the stability of the human TTF1 protein  
264 than that of the interaction cluster in the C-terminal domain. The Z-scores of the central  
265 residues determined by centrality analysis are enlisted in Table 2.

266

267 **Fig 6:** The central residues of TTF1 identified by RIN and centrality analyses in the **A)** 3-  
268 dimensional structure of TTF1. **B)** The central residues in the RIN of TTF1 in 2D  
269 representation. The nodes and edges represent the residues and inter-residue interactions,  
270 respectively. The size of the nodes corresponds to the value of the RCA Z-score, with bigger  
271 nodes corresponding to residues with higher values of Z-scores. The residues with RCA Z-  
272 score  $\geq 2$  and  $\geq 4$  are indicated in yellow and red, respectively.

273 **Table 2: Central residues of TTF1, determined by centrality analysis**

| Central residue | Corresponding domain | RCA Z-score | Secondary structure |
|-----------------|----------------------|-------------|---------------------|
| K68             | Oligomerisation      | 7.246       | Loop                |
| E196            | Oligomerisation      | 7.2         | Helix               |
| R71             | Oligomerisation      | 7.161       | Loop                |
| E195            | Oligomerisation      | 7.111       | Loop                |
| Q30             | Oligomerisation      | 7.097       | Helix               |
| H1E34           | Oligomerisation      | 6.991       | Helix               |
| W198            | Oligomerisation      | 6.813       | Helix               |
| R38             | Oligomerisation      | 6.682       | Helix               |
| G202            | Oligomerisation      | 6.555       | Loop                |
| E35             | Oligomerisation      | 6.453       | Helix               |
| K17             | Oligomerisation      | 6.366       | Helix               |
| E206            | Oligomerisation      | 5.788       | Helix               |
| K31             | Oligomerisation      | 4.573       | Helix               |

|      |                       |       |       |
|------|-----------------------|-------|-------|
| S226 | Oligomerisation       | 4.417 | Loop  |
| E27  | Oligomerisation       | 4.309 | Helix |
| T186 | Oligomerisation       | 4.204 | Loop  |
| N228 | Oligomerisation       | 3.947 | Loop  |
| R229 | Oligomerisation       | 3.614 | Loop  |
| S23  | Oligomerisation       | 3.159 | Helix |
| I660 | myb/SANT-like 1       | 2.83  | Helix |
| R664 | myb/SANT-like 2       | 2.825 | Loop  |
| K434 | Chromatin remodelling | 2.782 | Helix |
| F657 | myb/SANT-like 1       | 2.778 | Helix |
| R164 | Oligomerisation       | 2.769 | Loop  |
| E165 | Oligomerisation       | 2.693 | Loop  |
| S895 | -                     | 2.693 | Helix |
| N893 | -                     | 2.661 | Loop  |
| E882 | -                     | 2.608 | Loop  |
| T896 | -                     | 2.596 | Helix |
| S161 | Oligomerisation       | 2.594 | Loop  |
| Q172 | Oligomerisation       | 2.548 | Helix |
| E191 | Oligomerisation       | 2.535 | Loop  |
| E431 | Chromatin remodelling | 2.527 | Helix |
| G899 | -                     | 2.499 | Loop  |
| A176 | Oligomerisation       | 2.469 | Helix |

|      |                       |       |       |
|------|-----------------------|-------|-------|
| S435 | Chromatin remodelling | 2.388 | Helix |
| R902 | -                     | 2.326 | Loop  |
| R182 | Oligomerisation       | 2.302 | Helix |
| D471 | -                     | 2.069 | Helix |

274

## 275 **2.7. Intra-residue hydrogen bonds**

276 Hydrogen bonds with occupancy  $\geq 75\%$  and  $\geq 85\%$  throughout the 200 ns trajectory and in  
277 the last 50 ns, respectively, were considered to be important for the structural stability of the  
278 protein. The frequency of the hydrogen bonds throughout the trajectory and in the last 50 ns  
279 was determined using VMD. The occupancy of the intra-residue hydrogen bonds formed by  
280 the central residues is provided in S 1 Table, and the occupancy of all the intra-residue  
281 hydrogen bonds with occupancy  $\geq 75\%$  and  $\geq 85\%$  throughout the 200 ns trajectory and in  
282 the last 50 ns, respectively, are provided in the S 1 Table. The results of interaction analyses  
283 revealed that residues K17, E27, Q30, E35, R164, W198, and N228 of the oligomerisation  
284 domain, K434 of the chromatin remodelling region, and F657 of the myb/SANT-like-1  
285 domain were most crucial to the structural stability of the protein, as indicated by the number  
286 of intra-residue hydrogen bonds and the occupancy of the hydrogen bonds throughout the  
287 trajectory.

## 288 **3. Discussion**

289 TTF1 is a crucial multifunctional nucleolar protein that regulates both transcription initiation  
290 as well as transcriptional termination of ribosomal genes by binding to specific motif



291 sequence and—also arrests of the replication fork in polar fashion [2]. In addition, TTF1  
292 regulates the transcription of genes transcribed by RNA polymerase I. Using truncated human  
293 and murine TTF1 proteins, Evers and Grummt first reported species-specific sequence  
294 differences in the DNA-binding region of mammalian TTF1 [3]. Despite its major regulatory  
295 role in mammalian transcription, replication and chromatin remodelling, the complete  
296 structure of human TTF1 remains to be elucidated to date. A partial structure of human TTF1  
297 has been predicted by AlphaFold v2.0, which uses artificial intelligence for predicting the 3-  
298 dimensional structure of proteins. However, the structure predicted by AlphaFold is partial  
299 (residues 491-866), and the remaining residues are largely unfolded, and the confidence of  
300 prediction of these unfolded regions is very low [27]. As all the residues of a protein are  
301 important for its complete regulation and function, it is necessary to consider that protein in  
302 its entirety in structural analyses. In this study, we therefore attempted to construct the  
303 complete structure of the human TTF1 protein using *ab initio* modelling and MD simulations,  
304 and also identified the residues that are central to the structural stability of human TTF1 by  
305 network analyses. To the best of our knowledge, this study is the first to report the complete  
306 structure of the human TTF1 protein (refer supplementary for coordinate file).

307 Owing to the lack of suitable structural homologues in the PDB with sequence coverage  
308 above the twilight zone, the structure of TTF1 was modelled using *ab initio* methods. The  
309 model of TTF1 thus obtained was subjected to functional validation and GO analysis for  
310 establishing the functional relevance. MD simulations are frequently used for obtaining  
311 atom-level insights into the structural dynamics and behaviour of biomolecular system. The  
312 stability of the model was subsequently evaluated by MD simulation for 200 ns, using an

313 explicit TIP4P solvent, and the trajectory was analysed for investigating structural stability  
314 and hydrogen bond frequency. The representative conformation of the human TTF1 protein  
315 was obtained by trajectory clustering, and the residues that play a central role in the structural  
316 stability of TTF1 were identified by network analysis and determination of residue centrality.  
317 The results of RIN analysis and computation of centrality measures revealed two interaction  
318 clusters in the structure of human TTF1, with one in the oligomerisation domain of TTF1  
319 and the other in the C-terminal domain. The data further indicated that the residue cluster in  
320 the oligomerisation domain plays a more significant role in the stability of TTF1, compared  
321 to that in the C-terminal domain. The N-terminal oligomerization domain has been shown to  
322 play important regulatory function [2] while the C-terminal domain is involved in  
323 transcription termination [5]. In the absence of experimentally-derived structural data  
324 pertaining to the human TTF1 protein, we believe that the results of our study provide  
325 valuable structural information, including domain architecture, and their characteristics,  
326 among others. Hence, our study could facilitate future studies aimed towards understanding  
327 the mechanism underlying the function of the human TTF1, including its interaction with  
328 other protein, and for engineering this protein with the purpose of solving its physical  
329 structure, drug design and therapeutic applications etc.

#### 330 **4. Conclusion**

331 Conclusively, this is very first study to report complete structure of the essential human TTF1  
332 protein, using computational modelling, and identify the residues and its characteristics that  
333 are central to the structural stability of the protein.

#### 334 **5. Materials and Methods**

### 335 **5.1 Sequence retrieval and sequence-based analyses**

336 The sequence of TTF1 was retrieved from UniProtKB (UniProtKB accession number:  
337 Q15361). The physicochemical properties of TTF1 were analyzed using ProtParam [28], and  
338 the disorder profile was analyzed using DisoPred version 3.1 [29,30].

### 339 **5.2 *Ab initio* modelling of TTF1**

340 The structural homologues of human TTF1 in the PDB was searched using BLASTp and  
341 threading-based approaches, for identifying suitable templates for homology modelling.  
342 Owing to the lack of suitable structural templates, the structure of human TTF1 was modelled  
343 using *ab initio* modelling, using the iTasser server [20]. In the iTasser algorithm, the final  
344 models are selected using the SPICKER program for clustering the generated structures. The  
345 structure of TTF1 generated by iTasser was initially minimised using the Yasara energy  
346 minimization server, with the Yasara force field [24]. The energy minimised structure was  
347 then validated using Ramachandran plot analysis and ProSA [31,32].

### 348 **5.3 Functional validation of TTF1 constructed by *ab initio* modelling**

349 The models generated by iTasser were functionally validated using the TM-align program  
350 for determining the structures in the PDB that are structurally, and thus functionally, similar  
351 to the models of TTF1p constructed by *ab initio* modelling. The TM-align program was used  
352 to identify structures in the PDB that are structurally similar to the model generated by  
353 iTasser. This program determines the similarity between proteins on the basis of the TM-  
354 score, a scoring function that provides a quantitative measure of topological similarity  
355 between proteins [33]. It provides a measure of structural similarity, with values > 0.5

356 indicating models of correct topology [34]. The models were further validated using the  
357 COACH and COFACTOR programs for predicting the ligand binding sites, based on the  
358 similarity of the protein folds with functional templates [35,36]. The result of ligand binding  
359 site prediction was mapped to the results of sequence-based conserved domain (CD) analyses  
360 using the CD search tool of NCBI [37]. The molecular function of the modelled protein was  
361 further validated by consensus-based gene ontology (GO) search.

#### 362 **5.4 MD simulations**

363 The model of TTF1 obtained by *ab initio* modelling was subjected to MD simulations for  
364 200 ns using Flare v4, which is based on the OpenMM Toolkit, for studying the structural  
365 stability and determining any possible conformational changes of TTF1p. The protein was  
366 then prepared in Flare v4 at pH 7.4, and solvated in TIP4P solvent using a buffer of 10 Å  
367 thickness. The system was subsequently neutralised by the addition of 28 Cl<sup>-</sup> ions. The  
368 system was then minimized until the energy tolerance reached 0.25 Kcal/mol, and  
369 subsequently equilibrated for 200 ps. It was then finally subjected to 200 ns MD simulations  
370 at a temperature of 298 K and a pressure of 1 bar, using the XED force field and the NPT  
371 ensemble. The timestep was set to 2 fs.

372 The values of root mean square deviation (RMSD), root mean square fluctuations  
373 (RMSF), and radius of gyration (RoG) of the protein backbone throughout the trajectory was  
374 analyzed using the vmdICE plugin in VMD v1.9.3 [38,39]. The occupancy of the inter-  
375 residue hydrogen bonds throughout the 200 ns trajectory and in the last 50 ns was determined  
376 using VMD v1.9.3. The portion of the trajectory following equilibration was clustered using

377 Chimera v1.14, and the representative frame of the most populated cluster was selected as  
378 the representative conformation of TTF1p [40].

### 379 **5.5 Determination of residue interaction networks (RINs) and centrality analysis**

380 The RINs of TTF1p were determined using the RINalyzer plugin in Cytoscape v3.8.2  
381 [41,42]. The network centrality measures were computed using the RINspector plugin in  
382 Cytoscape v3.8.2, based on the residue centrality analysis (RCA) Z-score.

### 383 **Conflicts of interest**

384 The authors have no conflicts of interest to declare.

### 385 **Acknowledgement**

386 The authors are thankful to the Director Prof. A.K. Tripathi and Coordinator Prof. S.M.  
387 Singh, School of Biotechnology, Institute of Science, Banaras Hindu University for  
388 providing space and facilities to conduct the research. We thank Dr. V.K. Singh for providing  
389 valuable suggestions during the study. We are thankful to Department of Biotechnology,  
390 Govt. of India for funding Samarendra K Singh (SKS) and Kumud Tiwari (KT) with grant  
391 and fellowship respectively. Author Aditi Gangopadhyay (AG) acknowledges the Council of  
392 Scientific and Industrial Research (CSIR), New Delhi, for providing financial assistance. We  
393 also thank CSIR for funding the fellowships of Gajender Singh (GS).

### 394 **Author contribution**

395 SKS was involved in the Conceptualization and designing; Supervision; Writing - critical  
396 review & editing of the manuscript. KT and AG involved in Data curation; Formal analyses;

397 Investigation; Methodology; Project administration; Resources; Software; Validation;  
398 Visualization; Writing - original draft; review & editing of the manuscript. GS contributed  
399 analyses tools and data; Visualization; Writing – original draft.

#### 400 **Funding statement**

401 The research was funded by Department of Biotechnology (DBT), Govt. of India, RLS grant  
402 (BT/RLF/Re-entry/43/2016) to SKS and JRF fellowship to KT. Council of Scientific and  
403 Industrial Research (CSIR) also supported this research by funding AG (RA grant  
404 number: 09/028(1088)2019-EMR-I) and GS (JRF) by awarding fellowships.

405

#### 406 **References**

- 407 1. Zhou H, Wang Y, Lv Q, Zhang J, Wang Q, Gao F, et al. Overexpression of  
408 ribosomal RNA in the development of human cervical cancer is associated with  
409 rDNA promoter hypomethylation. *PLoS One*. 2016;11: e0163340.  
410 doi:10.1371/journal.pone.0163340
- 411 2. Akamatsu Y, Kobayashi T. The Human RNA Polymerase I Transcription Terminator  
412 Complex Acts as a Replication Fork Barrier That Coordinates the Progress of  
413 Replication with rRNA Transcription Activity. *Mol Cell Biol*. 2015;35: 1871–1881.  
414 doi:10.1128/mcb.01521-14
- 415 3. Evers R, Grummt I. Molecular coevolution of mammalian ribosomal gene terminator  
416 sequences and the transcription termination factor TTF-I. *Proc Natl Acad Sci U S A*.  
417 1995;92: 5827–5831. doi:10.1073/pnas.92.13.5827

- 418 4. Pütter V, Grummt F. Transcription termination factor TTF-I exhibits contrahelicase  
419 activity during DNA replication. *EMBO Rep.* 2002;3: 147–152. doi:10.1093/embo-  
420 reports/kvf027
- 421 5. Längst G, Blank TA, Becker PB, Grummt I. RNA polymerase I transcription on  
422 nucleosomal templates: The transcription termination factor TTF-I induces  
423 chromatin remodeling and relieves transcriptional repression. *EMBO J.* 1997;16:  
424 760–768. doi:10.1093/emboj/16.4.760
- 425 6. Aamann MD, Muftuoglu M, Bohr VA, Stevnsner T. Multiple interaction partners for  
426 Cockayne syndrome proteins: Implications for genome and transcriptome  
427 maintenance. *Mech Ageing Dev.* 2013;134: 212–224.  
428 doi:10.1016/j.mad.2013.03.009
- 429 7. Lessard F, Stefanovsky V, Tremblay MG, Moss T. The cellular abundance of the  
430 essential transcription termination factor TTF-I regulates ribosome biogenesis and is  
431 determined by MDM2 ubiquitinylation. *Nucleic Acids Res.* 2012;40: 5357–5367.  
432 doi:10.1093/nar/gks198
- 433 8. Lessard F, Morin F, Ivanchuk S, Langlois F, Stefanovsky V, Rutka J, et al. The ARF  
434 Tumor Suppressor Controls Ribosome Biogenesis by Regulating the RNA  
435 Polymerase I Transcription Factor TTF-I. *Mol Cell.* 2010;38: 539–550.  
436 doi:10.1016/j.molcel.2010.03.015
- 437 9. Stults DM, Killen MW, Williamson EP, Hourigan JS, Vargas HD, Arnold SM, et al.  
438 Human rRNA gene clusters are recombinational hotspots in cancer. *Cancer Res.*

- 439 2009;69: 9096–9104. doi:10.1158/0008-5472.CAN-09-2680
- 440 10. Komatsu H, Iguchi T, Ueda M, Nambara S, Saito T, Hirata H, et al. Clinical and  
441 biological significance of transcription termination factor, RNA polymerase i in  
442 human liver hepatocellular carcinoma. *Oncol Rep.* 2016;35: 2073–2080.  
443 doi:10.3892/or.2016.4593
- 444 11. Ueda M, Iguchi T, Nambara S, Saito T, Komatsu H, Sakimura S, et al.  
445 Overexpression of Transcription Termination Factor 1 is Associated with a Poor  
446 Prognosis in Patients with Colorectal Cancer. *Ann Surg Oncol.* 2015;22: 1490–1498.  
447 doi:10.1245/s10434-015-4652-7
- 448 12. Sander EE, Grummt I. Oligomerization of the transcription termination factor TTF-I:  
449 Implications for the structural organization of ribosomal transcription units. *Nucleic  
450 Acids Res.* 1997;25: 1142–1147. doi:10.1093/nar/25.6.1142
- 451 13. Németh A, Guibert S, Tiwari VK, Ohlsson R, Längst G. Epigenetic regulation of  
452 TTF-I-mediated promoter-terminator interactions of rRNA genes. *EMBO J.*  
453 2008;27: 1255–1265. doi:10.1038/emboj.2008.57
- 454 14. Boutin J, Lessard F, Tremblay MG, Moss T. The short N-terminal repeats of  
455 transcription termination factor 1 contain semi-redundant nucleolar localization  
456 signals and P19-ARF tumor suppressor binding sites. *Yale J Biol Med.* 2019;92:  
457 385–396. Available: /pmc/articles/PMC6747939/
- 458 15. Jaiswal R, Choudhury M, Zaman S, Singh S, Santosh V, Bastia D, et al. Functional  
459 architecture of the Reb1-Ter complex of *Schizosaccharomyces pombe*. *Proc Natl*



- 460 Acad Sci U S A. 2016;113: E2267–E2276. doi:10.1073/pnas.1525465113
- 461 16. Park SH, Yu KL, Jung YM, Lee SD, Kim MJ, You JC. Investigation of functional  
462 roles of transcription termination factor-1 (TTF-I) in HIV-1 replication. *BMB Rep.*  
463 2018;51: 338–343. doi:10.5483/BMBRep.2018.51.7.032
- 464 17. Singh SK, Sabatinos S, Forsburg S, Bastia D. Regulation of Replication Termination  
465 by Reb1 Protein-Mediated Action at a Distance. *Cell.* 2010;142: 868–878.  
466 doi:10.1016/j.cell.2010.08.013
- 467 18. Khor BY, Tye GJ, Lim TS, Choong YS. General overview on structure prediction of  
468 twilight-zone proteins. *Theor Biol Med Model.* 2015;12. doi:10.1186/s12976-015-  
469 0014-1
- 470 19. Chung SY, Subbiah S. A structural explanation for the twilight zone of protein  
471 sequence homology. *Structure.* 1996;4: 1123–1127. doi:10.1016/S0969-  
472 2126(96)00119-0
- 473 20. Roy A, Kucukural A, Zhang Y. I-TASSER: A unified platform for automated  
474 protein structure and function prediction. *Nat Protoc.* 2010;5: 725–738.  
475 doi:10.1038/nprot.2010.5
- 476 21. Yang J, Yan R, Roy A, Xu D, Poisson J, Zhang Y. The I-TASSER suite: Protein  
477 structure and function prediction. *Nature Methods.* *Nat Methods*; 2014. pp. 7–8.  
478 doi:10.1038/nmeth.3213
- 479 22. Kryshchuk A, Schwede T, Topf M, Fidelis K, Moult J. Critical assessment of  
480 methods of protein structure prediction (CASP)—Round XIII. *Proteins: Structure,*

- 481           Function and Bioinformatics. Proteins; 2019. pp. 1011–1020.  
482           doi:10.1002/prot.25823
- 483   23.   Rost B. Twilight zone of protein sequence alignments. Protein Eng. 1999;12: 85–94.  
484           doi:10.1093/protein/12.2.85
- 485   24.   Krieger E, Joo K, Lee J, Lee J, Raman S, Thompson J, et al. Improving physical  
486           realism, stereochemistry, and side-chain accuracy in homology modeling: Four  
487           approaches that performed well in CASP8. Proteins: Structure, Function and  
488           Bioinformatics. Proteins; 2009. pp. 114–122. doi:10.1002/prot.22570
- 489   25.   M W, MJ S. ProSA-web: interactive web service for the recognition of errors in  
490           three-dimensional structures of proteins. Nucleic Acids Res. 2007;35.  
491           doi:10.1093/NAR/GKM290
- 492   26.   Zhang B, Ye W, Ye Y, Zhou H, Saeed AFUH, Chen J, et al. Structural insights into  
493           Cas13b-guided CRISPR RNA maturation and recognition. Cell Research. Cell Res;  
494           2018. pp. 1198–1201. doi:10.1038/s41422-018-0109-4
- 495   27.   Jumper J, Evans R, Pritzel A, Green T, Figurnov M, Ronneberger O, et al. Highly  
496           accurate protein structure prediction with AlphaFold. Nature. 2021;596: 583–589.  
497           doi:10.1038/s41586-021-03819-2
- 498   28.   Gasteiger E, Hoogland C, Gattiker A, Duvaud S, Wilkins MR, Appel RD, et al.  
499           Protein Identification and Analysis Tools on the ExPASy Server. The Proteomics  
500           Protocols Handbook. Humana Press; 2005. pp. 571–607. doi:10.1385/1-59259-890-  
501           0:571

- 502 29. Jones DT, Cozzetto D. DISOPRED3: Precise disordered region predictions with  
503 annotated protein-binding activity. *Bioinformatics*. 2015;31: 857–863.  
504 doi:10.1093/bioinformatics/btu744
- 505 30. Ward JJ, McGuffin LJ, Bryson K, Buxton BF, Jones DT. The DISOPRED server for  
506 the prediction of protein disorder. *Bioinformatics*. 2004;20: 2138–2139.  
507 doi:10.1093/bioinformatics/bth195
- 508 31. Wiederstein M, Sippl MJ. ProSA-web: Interactive web service for the recognition of  
509 errors in three-dimensional structures of proteins. *Nucleic Acids Res*. 2007;35:  
510 W407-10. doi:10.1093/nar/gkm290
- 511 32. Laskowski RA, MacArthur MW, Moss DS, Thornton JM. PROCHECK: a program  
512 to check the stereochemical quality of protein structures. *J Appl Crystallogr*.  
513 1993;26: 283–291. doi:10.1107/s0021889892009944
- 514 33. Zhang Y, Skolnick J. TM-align: A protein structure alignment algorithm based on  
515 the TM-score. *Nucleic Acids Res*. 2005;33: 2302–2309. doi:10.1093/nar/gki524
- 516 34. Zhang Y, Skolnick J. Scoring function for automated assessment of protein structure  
517 template quality. *Proteins Struct Funct Genet*. 2004;57: 702–710.  
518 doi:10.1002/prot.20264
- 519 35. Yang J, Roy A, Zhang Y. Protein-ligand binding site recognition using  
520 complementary binding-specific substructure comparison and sequence profile  
521 alignment. *Bioinformatics*. 2013;29: 2588–2595. doi:10.1093/bioinformatics/btt447
- 522 36. Zhang C, Freddolino PL, Zhang Y. COFACTOR: Improved protein function

- 523 prediction by combining structure, sequence and protein-protein interaction  
524 information. *Nucleic Acids Res.* 2017;45: W291–W299. doi:10.1093/nar/gkx366
- 525 37. Lu S, Wang J, Chitsaz F, Derbyshire MK, Geer RC, Gonzales NR, et al.  
526 CDD/SPARCLE: The conserved domain database in 2020. *Nucleic Acids Res.*  
527 2020;48: D265–D268. doi:10.1093/nar/gkz991
- 528 38. Humphrey W, Dalke A, Schulten K. VMD: Visual molecular dynamics. *J Mol*  
529 *Graph.* 1996;14: 33–38. doi:10.1016/0263-7855(96)00018-5
- 530 39. Knapp B, Lederer N, Omasits U, Schreiner W. VmdICE: A plug-in for rapid  
531 evaluation of molecular dynamics simulations using VMD. *J Comput Chem.*  
532 2010;31: 2868–2873. doi:10.1002/jcc.21581
- 533 40. Pettersen EF, Goddard TD, Huang CC, Couch GS, Greenblatt DM, Meng EC, et al.  
534 UCSF Chimera - A visualization system for exploratory research and analysis. *J*  
535 *Comput Chem.* 2004;25: 1605–1612. doi:10.1002/jcc.20084
- 536 41. Shannon P, Markiel A, Ozier O, Baliga NS, Wang JT, Ramage D, et al. Cytoscape:  
537 A software Environment for integrated models of biomolecular interaction networks.  
538 *Genome Res.* 2003;13: 2498–2504. doi:10.1101/gr.1239303
- 539 42. Doncheva NT, Klein K, Domingues FS, Albrecht M. Analyzing and visualizing  
540 residue networks of protein structures. *Trends in Biochemical Sciences.* *Trends*  
541 *Biochem Sci*; 2011. pp. 179–182. doi:10.1016/j.tibs.2011.01.002
- 542

543 **Supporting information**

544 **S 1 Fig.** Sequence-based representation of the disordered and protein binding regions of  
 545 TTF1, as predicted using PsiPred.

546 **S 2 Fig.** Results of CD search indicating the presence of a SANT/Myb-like DNA-binding  
 547 domain in TTF1.

548 **S 1 Table.** Occupancy of the hydrogen bonds formed by the central residues throughout the  
 549 trajectory and in the last 50 ns.

550

| Donor      | Acceptor   | Occupancy (200 ns) | Occupancy (last 50 ns) |
|------------|------------|--------------------|------------------------|
| K68*-Main  | L67-Side   | 75.34%             | 85.41%                 |
| A175-Main  | A176*-Main | 76.84%             | 78.12%                 |
| R71*-Main  | K68*-Main  | 77.29%             | 83.02%                 |
| S197-Side  | E195*-Side | 77.46%             | 99.50%                 |
| E27*-Main  | I24-Main   | 77.51%             | 81.02%                 |
| D471*-Main | A469-Main  | 77.66%             | 97.60%                 |
| T896*-Main | N893*-Main | 78.04%             | 97.60%                 |
| E882*-Main | E880-Side  | 78.41%             | 94.21%                 |
| D185-Side  | N228*-Side | 78.66%             | 82.72%                 |
| S227-Side  | R229*-Side | 79.01%             | 119.18%                |
| K17*-Main  | D16-Side   | 79.29%             | 91.01%                 |
| R182*-Side | N228*-Side | 79.36%             | 80.92%                 |
| E431*-Main | A427-Main  | 79.41%             | 91.31%                 |
| E209-Main  | E206*-Main | 79.41%             | 93.61%                 |
| P437-Side  | K434*-Main | 79.76%             | 88.81%                 |
| W198*-Side | G202*-Main | 79.94%             | 81.72%                 |
| I474-Main  | D471*-Main | 79.99%             | 90.11%                 |
| S197-Main  | W198*-Main | 80.58%             | 83.12%                 |
| A183-Main  | R182*-Side | 81.46%             | 75.82%                 |
| F657*-Main | K656-Side  | 82.58%             | 87.91%                 |
| E431*-Side | A427-Main  | 82.83%             | 117.98%                |
| K18-Main   | K17*-Side  | 83.03%             | 99.00%                 |
| P203-Side  | W198*-Main | 83.56%             | 125.27%                |
| E35*-Main  | H34*-Side  | 84.43%             | 82.82%                 |
| K31*-Side  | E27*-Side  | 84.46%             | 125.47%                |
| F657*-Main | V653-Main  | 84.53%             | 82.52%                 |
| R164*-Main | V163-Side  | 85.01%             | 94.91%                 |
| K31*-Main  | H32-Main   | 85.61%             | 86.21%                 |
| E430-Main  | E431*-Main | 85.63%             | 90.91%                 |
| A176*-Main | S177-Main  | 86.01%             | 82.12%                 |
| S23*-Main  | K19-Main   | 86.01%             | 100.00%                |
| Q30*-Side  | E27*-Main  | 86.23%             | 87.21%                 |
| S895*-Main | N893*-Side | 86.26%             | 95.40%                 |

|            |            |        |         |
|------------|------------|--------|---------|
| K656-Main  | F657*-Main | 86.38% | 86.81%  |
| D471*-Main | S472-Main  | 86.66% | 92.11%  |
| V433-Main  | K434*-Main | 87.06% | 82.32%  |
| F657*-Side | V653-Main  | 87.33% | 95.70%  |
| K434*-Main | S435*-Main | 87.43% | 94.61%  |
| S661-Side  | F657*-Main | 87.91% | 78.82%  |
| S33-Main   | Q30*-Main  | 88.28% | 90.11%  |
| E27*-Main  | R28-Main   | 88.51% | 88.31%  |
| A176*-Main | Q172*-Main | 88.93% | 95.00%  |
| K31*-Side  | E27*-Main  | 89.63% | 85.31%  |
| R438-Main  | S435*-Main | 89.68% | 94.11%  |
| D471*-Main | E467-Main  | 89.81% | 90.51%  |
| I660*-Main | F657*-Main | 89.93% | 93.61%  |
| Q30*-Main  | E27*-Main  | 90.08% | 92.71%  |
| P188-Side  | N228*-Main | 90.83% | 115.78% |
| E431*-Main | G432-Main  | 91.03% | 97.20%  |
| S435*-Main | E431*-Main | 91.05% | 94.61%  |
| R664*-Main | I660*-Main | 91.45% | 126.17% |
| E882*-Main | S881-Side  | 91.93% | 94.71%  |
| E35*-Main  | I36-Main   | 92.25% | 88.01%  |
| Q181-Side  | R182*-Main | 92.65% | 87.61%  |
| T896*-Main | S895*-Side | 92.85% | 81.02%  |
| K68*-Main  | S65-Main   | 93.45% | 84.82%  |
| S435*-Main | K434*-Side | 93.58% | 96.20%  |
| R229*-Main | N228*-Side | 93.73% | 97.80%  |
| S661-Main  | F657*-Main | 93.83% | 89.11%  |
| I660*-Main | S661-Main  | 93.85% | 98.60%  |
| Q439-Main  | S435*-Main | 93.88% | 92.51%  |
| G901-Main  | G899*-Main | 94.28% | 99.50%  |
| E27*-Main  | S23*-Main  | 94.65% | 94.31%  |
| A176*-Main | A175-Side  | 94.73% | 97.70%  |
| R71*-Main  | S70-Side   | 95.15% | 114.89% |
| S472-Main  | D471*-Side | 95.33% | 93.91%  |
| Q30*-Main  | K31*-Main  | 95.33% | 96.20%  |
| I36-Main   | E35*-Side  | 95.38% | 92.11%  |
| L62-Side   | H34*-Main  | 95.68% | 112.79% |
| E35*-Main  | H32-Main   | 96.10% | 91.71%  |
| R436-Main  | K434*-Main | 96.93% | 93.11%  |
| S190-Main  | E191*-Main | 97.15% | 97.20%  |
| E470-Main  | D471*-Main | 97.18% | 95.40%  |
| E27*-Main  | K26-Side   | 97.50% | 96.80%  |
| K26-Main   | S23*-Main  | 97.68% | 98.20%  |
| H34*-Main  | E35*-Main  | 97.73% | 95.90%  |
| I36-Main   | H34*-Main  | 98.10% | 123.08% |
| G432-Main  | E431*-Side | 98.18% | 98.50%  |
| K166-Main  | E165*-Side | 98.18% | 99.30%  |
| S435*-Main | R436-Main  | 98.25% | 96.60%  |
| D471*-Main | E470-Side  | 98.43% | 97.00%  |
| R173-Main  | Q172*-Side | 98.45% | 104.40% |
| L67-Main   | K68*-Main  | 98.55% | 96.60%  |
| S200-Main  | E196*-Main | 98.70% | 96.50%  |
| N228*-Main | T186*-Main | 99.08% | 99.90%  |
| L199-Main  | E195*-Main | 99.18% | 99.40%  |
| T896*-Main | L897-Main  | 99.30% | 96.60%  |
| W198*-Main | E195*-Main | 99.30% | 99.50%  |
| E195*-Main | Q194-Side  | 99.50% | 99.40%  |
| V201-Main  | W198*-Main | 99.55% | 99.10%  |

|            |            |         |         |
|------------|------------|---------|---------|
| W903-Main  | R902*-Side | 99.75%  | 100.30% |
| W198*-Main | L199-Main  | 99.80%  | 100.00% |
| K31*-Main  | E27*-Main  | 99.85%  | 99.60%  |
| T186*-Main | D185-Side  | 99.90%  | 99.90%  |
| E195*-Main | K700-Main  | 99.98%  | 99.70%  |
| D185-Main  | T186*-Main | 100.00% | 100.00% |
| E165*-Main | K166-Main  | 100.02% | 100.00% |
| T186*-Main | L187-Main  | 100.02% | 100.10% |
| E195*-Main | E196*-Main | 100.05% | 100.10% |
| E230-Main  | R229*-Side | 100.07% | 96.80%  |
| Q194-Main  | E195*-Main | 100.07% | 100.00% |
| H160-Main  | S161*-Main | 100.07% | 100.10% |
| C892-Main  | N893*-Main | 100.22% | 100.20% |
| R164*-Main | E165*-Main | 100.27% | 100.20% |
| R71*-Main  | I72-Main   | 100.55% | 101.20% |
| K26-Main   | E27*-Main  | 100.57% | 100.40% |
| S161*-Main | K162-Main  | 101.10% | 100.10% |
| K31*-Main  | Q30*-Side  | 101.15% | 101.80% |
| C22-Main   | S23*-Main  | 101.20% | 105.19% |
| R229*-Main | E230-Main  | 101.22% | 101.90% |
| E95-Main   | L94-Side   | 101.35% | 104.10% |
| D39-Main   | R38*-Side  | 101.55% | 102.80% |
| Q30*-Side  | K31*-Main  | 101.65% | 102.90% |
| F37-Main   | R38*-Main  | 101.97% | 114.59% |
| S227-Side  | N228*-Main | 102.00% | 97.30%  |
| N228*-Main | R229*-Main | 102.32% | 100.20% |
| S23*-Main  | C22-Side   | 102.35% | 94.41%  |
| R436-Main  | S435*-Side | 102.40% | 94.01%  |
| V163-Side  | R164*-Main | 102.45% | 96.60%  |
| V201-Main  | G202*-Main | 102.62% | 103.70% |
| K17*-Main  | K18-Main   | 102.80% | 96.40%  |
| E430-Side  | E431*-Main | 102.85% | 93.61%  |
| R182*-Side | A176*-Main | 102.90% | 130.57% |
| K166-Main  | E165*-Main | 103.42% | 102.20% |
| S192-Main  | E191*-Side | 103.70% | 96.40%  |
| N893*-Main | S894-Main  | 104.27% | 104.10% |
| S33-Side   | Q30*-Main  | 104.37% | 95.00%  |
| K68*-Main  | K69-Main   | 104.37% | 98.50%  |
| F657*-Main | S658-Main  | 104.40% | 100.70% |
| L67-Side   | K68*-Main  | 104.57% | 144.26% |
| S70-Main   | R71*-Main  | 104.70% | 95.10%  |
| E191*-Main | S190-Side  | 105.00% | 102.60% |
| G899*-Main | L897-Main  | 105.77% | 158.34% |
| H32-Main   | K31*-Side  | 105.95% | 100.10% |
| H171-Main  | Q172*-Main | 106.65% | 101.40% |
| L897-Main  | S895*-Main | 106.80% | 133.17% |
| S895*-Side | E165*-Side | 106.85% | 204.70% |
| Q663-Main  | R664*-Main | 107.02% | 117.68% |
| S881-Side  | E882*-Main | 107.50% | 138.56% |
| E35*-Main  | S33-Main   | 107.55% | 100.40% |
| E431*-Main | E430-Side  | 107.60% | 113.99% |
| R902*-Main | W903-Main  | 107.62% | 104.10% |
| K225-Main  | S226*-Main | 107.67% | 107.29% |
| S161*-Main | H160-Side  | 109.75% | 95.40%  |
| R28-Main   | E27*-Side  | 110.17% | 107.49% |
| S881-Main  | E882*-Main | 111.24% | 105.79% |
| E882*-Main | G883-Main  | 111.49% | 115.68% |

|            |            |         |         |
|------------|------------|---------|---------|
| K434*-Main | V433-Side  | 111.57% | 127.37% |
| K434*-Side | Q663-Main  | 111.84% | 118.18% |
| S227-Main  | N228*-Main | 113.14% | 115.48% |
| Q30*-Main  | P29-Side   | 113.47% | 113.29% |
| S435*-Main | V433-Main  | 114.04% | 104.90% |
| S226*-Main | K224-Main  | 114.97% | 136.76% |
| K174-Main  | Q172*-Main | 115.02% | 127.67% |
| K879-Side  | R902*-Side | 115.34% | 217.68% |
| S895*-Side | T896*-Main | 115.49% | 80.92%  |
| S661-Main  | I660*-Side | 115.52% | 124.58% |
| R902*-Main | Q900-Main  | 116.44% | 129.77% |
| I660*-Main | Q659-Side  | 116.72% | 140.86% |
| E165*-Main | R164*-Side | 117.87% | 159.94% |
| S40-Main   | R38*-Main  | 117.89% | 130.77% |
| K434*-Main | G432-Main  | 118.02% | 156.04% |
| V433-Main  | E431*-Main | 118.04% | 109.99% |
| R38*-Side  | E35*-Main  | 118.32% | 105.09% |
| N893*-Side | R164*-Side | 118.77% | 215.38% |
| F37-Main   | E35*-Main  | 118.79% | 126.77% |
| W198*-Side | L199-Main  | 119.27% | 118.88% |
| A176*-Side | Q172*-Main | 119.49% | 89.71%  |
| F657*-Side | A454-Main  | 119.77% | 171.13% |
| S435*-Side | R436-Main  | 120.59% | 144.56% |
| R902*-Side | K879-Side  | 120.66% | 247.15% |
| V433-Side  | K434*-Main | 120.76% | 134.97% |
| R184-Main  | R182*-Main | 120.99% | 114.99% |
| H34*-Main  | S33-Side   | 122.36% | 111.69% |
| E431*-Main | M429-Main  | 122.46% | 117.48% |
| S70-Side   | R71*-Main  | 122.59% | 123.88% |
| T896*-Side | N893*-Main | 123.06% | 208.99% |
| K68*-Main  | P66-Main   | 126.81% | 99.40%  |
| P29-Side   | Q30*-Main  | 127.76% | 125.87% |
| I660*-Side | S661-Main  | 127.76% | 135.36% |
| R164*-Side | N893*-Side | 128.19% | 248.15% |
| I660*-Main | S658-Main  | 128.79% | 173.53% |
| Q172*-Side | K803-Main  | 129.04% | 122.78% |
| R38*-Main  | I36-Main   | 129.06% | 104.90% |
| K68*-Side  | K69-Main   | 129.29% | 105.89% |
| S33-Main   | K31*-Main  | 131.36% | 139.16% |
| S662-Main  | I660*-Main | 131.58% | 86.01%  |
| G202*-Main | W198*-Side | 134.06% | 118.28% |
| E206*-Main | G204-Main  | 134.06% | 186.01% |
| N893*-Main | C892-Side  | 134.31% | 126.77% |
| G205-Main  | E206*-Main | 134.93% | 118.18% |
| E35*-Side  | I36-Main   | 135.38% | 125.47% |
| E191*-Side | S192-Main  | 135.86% | 145.65% |
| K17*-Side  | K18-Main   | 136.01% | 134.17% |
| V163-Main  | R164*-Main | 136.38% | 148.45% |
| R38*-Side  | D39-Main   | 136.88% | 107.79% |
| E196*-Side | S197-Main  | 137.48% | 136.06% |
| H160-Side  | S161*-Main | 137.56% | 185.51% |
| R182*-Side | A183-Main  | 137.63% | 136.76% |
| C22-Side   | S23*-Main  | 137.98% | 153.55% |
| S197-Main  | E196*-Side | 138.01% | 107.19% |
| R71*-Side  | I72-Main   | 138.53% | 132.07% |
| R664*-Main | N665-Main  | 138.96% | 156.54% |
| S197-Side  | W198*-Main | 139.06% | 130.97% |



|            |            |         |         |
|------------|------------|---------|---------|
| G202*-Main | W198*-Main | 139.33% | 141.26% |
| A176*-Side | S177-Main  | 139.86% | 141.46% |
| W198*-Side | S699-Side  | 141.23% | 190.21% |
| E431*-Side | G432-Main  | 141.73% | 172.33% |
| S895*-Side | N893*-Side | 141.73% | 173.23% |
| S894-Side  | S895*-Main | 143.00% | 136.36% |
| D16-Side   | K17*-Main  | 143.30% | 147.75% |
| K656-Side  | F657*-Main | 143.50% | 157.84% |
| E473-Main  | D471*-Main | 143.68% | 156.84% |
| S895*-Main | S894-Side  | 145.23% | 128.37% |
| F657*-Main | L655-Main  | 145.63% | 145.45% |
| R229*-Side | S227-Side  | 145.80% | 215.18% |
| S161*-Side | K162-Main  | 146.63% | 154.05% |
| Q663-Side  | R664*-Main | 146.88% | 101.10% |
| I24-Main   | S23*-Side  | 146.90% | 160.14% |
| S435*-Side | E431*-Main | 146.98% | 139.66% |
| S23*-Side  | I24-Main   | 148.58% | 131.57% |
| T896*-Side | L897-Main  | 148.63% | 178.42% |
| H32-Main   | Q30*-Main  | 148.75% | 144.16% |
| K434*-Side | S435*-Main | 149.48% | 165.43% |
| S894-Main  | N893*-Side | 150.75% | 151.95% |
| W198*-Main | S197-Side  | 151.25% | 157.04% |
| L897-Main  | T896*-Side | 152.00% | 182.52% |
| Q194-Side  | E195*-Main | 152.55% | 155.44% |
| R902*-Side | T896*-Main | 152.85% | 236.46% |
| A176*-Main | K174-Main  | 153.85% | 155.94% |
| D471*-Side | S472-Main  | 154.42% | 129.07% |
| E470-Side  | D471*-Main | 154.82% | 117.38% |
| K167-Main  | E165*-Main | 154.90% | 170.13% |
| Q659-Side  | I660*-Main | 156.85% | 186.51% |
| G202*-Main | V201-Side  | 157.22% | 152.05% |
| K31*-Side  | H32-Main   | 157.72% | 183.82% |
| G898-Main  | G899*-Main | 158.45% | 136.66% |
| Q30*-Main  | R28-Main   | 159.10% | 163.44% |
| L199-Main  | W198*-Side | 159.12% | 164.04% |
| S33-Side   | H34*-Main  | 159.62% | 156.54% |
| E206*-Side | I207-Main  | 159.67% | 127.57% |
| V201-Side  | G202*-Main | 159.82% | 169.03% |
| H193-Main  | E191*-Main | 160.04% | 161.24% |
| T208-Main  | E206*-Main | 160.74% | 192.31% |
| S70-Main   | K68*-Main  | 161.44% | 179.72% |
| H34*-Main  | H32-Main   | 163.47% | 161.64% |
| Q30*-Side  | R71*-Main  | 165.09% | 194.81% |
| R164*-Side | V163-Main  | 166.04% | 191.01% |
| W198*-Main | E196*-Main | 167.82% | 178.82% |
| K162-Main  | S161*-Side | 168.42% | 177.02% |
| K17*-Main  | S15-Main   | 168.49% | 147.05% |
| C892-Side  | N893*-Main | 168.52% | 151.65% |
| H34*-Side  | E35*-Main  | 168.84% | 165.63% |
| D185-Side  | T186*-Main | 169.34% | 169.83% |
| Q659-Main  | F657*-Main | 171.14% | 183.42% |
| S190-Side  | E191*-Main | 171.89% | 188.21% |
| S226*-Main | S227-Main  | 171.91% | 160.04% |
| K391-Side  | E431*-Side | 173.11% | 525.57% |
| Q172*-Main | H171-Side  | 174.26% | 173.13% |
| K26-Side   | E27*-Main  | 174.71% | 170.13% |
| W178-Main  | A176*-Main | 174.79% | 172.33% |

|            |            |         |         |
|------------|------------|---------|---------|
| S200-Side  | E196*-Main | 175.24% | 167.83% |
| T896*-Main | S894-Main  | 175.56% | 184.32% |
| G901-Main  | R902*-Main | 175.79% | 185.51% |
| E27*-Side  | R28-Main   | 176.59% | 143.36% |
| R664*-Side | E453-Side  | 177.26% | 163.94% |
| R229*-Side | E230-Main  | 178.89% | 193.61% |
| E195*-Side | E196*-Main | 181.06% | 179.82% |
| N228*-Main | S227-Side  | 181.73% | 188.41% |
| R164*-Side | E882*-Side | 182.91% | 338.56% |
| K434*-Side | E430-Main  | 183.93% | 255.14% |
| S895*-Main | N893*-Main | 184.93% | 197.50% |
| N228*-Side | R229*-Main | 185.01% | 193.71% |
| L187-Main  | T186*-Side | 185.56% | 190.91% |
| R902*-Side | W903-Main  | 186.46% | 191.41% |
| Q172*-Side | R173-Main  | 186.56% | 181.12% |
| R164*-Side | E165*-Main | 187.01% | 173.33% |
| A175-Side  | A176*-Main | 188.11% | 193.61% |
| H25-Main   | S23*-Main  | 189.38% | 194.61% |
| W198*-Side | Q194-Side  | 190.18% | 201.00% |
| G202*-Main | P203-Main  | 190.80% | 196.10% |
| K17*-Side  | E206*-Side | 192.30% | 445.15% |
| S197-Main  | E195*-Main | 193.05% | 194.41% |
| G899*-Main | Q900-Main  | 194.33% | 200.00% |
| E165*-Side | K166-Main  | 194.58% | 198.40% |
| R182*-Main | S180-Main  | 194.80% | 195.40% |
| N228*-Side | T186*-Main | 197.88% | 215.28% |
| S200-Main  | W198*-Main | 199.08% | 198.20% |
| G202*-Main | P203-Side  | 199.68% | 200.00% |
| P203-Main  | G202*-Main | 200.00% | 200.00% |
| S226*-Main | K225-Main  | 200.12% | 200.20% |
| R902*-Side | G901-Main  | 204.92% | 249.75% |
| S649-Side  | D471*-Side | 208.30% | 151.15% |
| K166-Side  | E165*-Main | 214.44% | 215.08% |
| S699-Side  | W198*-Side | 215.84% | 262.04% |
| R664*-Main | Q663-Main  | 217.54% | 200.20% |
| K434*-Side | E431*-Side | 222.09% | 399.30% |
| K17*-Side  | P13-Main   | 224.49% | 154.05% |
| S226*-Side | K225-Main  | 227.46% | 213.69% |
| K69-Side   | E35*-Side  | 229.14% | 129.47% |
| E196*-Main | E195*-Side | 237.91% | 280.82% |
| K17*-Side  | P203-Main  | 239.81% | 142.26% |
| N228*-Side | D185-Main  | 240.05% | 254.15% |
| R664*-Side | Q663-Main  | 248.33% | 260.14% |
| N615-Side  | D471*-Side | 252.77% | 228.37% |
| K17*-Side  | G204-Main  | 275.61% | 254.55% |
| S227-Side  | E191*-Side | 276.89% | 290.61% |
| K17*-Side  | V201-Main  | 277.41% | 122.28% |
| S227-Side  | S226*-Main | 278.39% | 270.13% |
| R71*-Side  | E9-Side    | 284.26% | 79.12%  |
| K434*-Side | E430-Side  | 288.83% | 660.24% |
| K17*-Side  | G202*-Main | 295.48% | 306.79% |
| T186*-Main | D185-Main  | 300.47% | 300.50% |
| E195*-Main | Q194-Main  | 301.10% | 301.20% |
| E165*-Main | R164*-Main | 301.17% | 300.40% |
| E196*-Main | E195*-Main | 301.75% | 300.40% |
| N893*-Main | C892-Main  | 304.20% | 309.79% |
| L187-Main  | T186*-Main | 304.65% | 302.40% |

|            |            |         |         |
|------------|------------|---------|---------|
| R229*-Main | N228*-Main | 305.92% | 302.10% |
| S161*-Main | H160-Main  | 306.82% | 306.69% |
| W903-Main  | R902*-Main | 308.55% | 304.20% |
| K162-Main  | S161*-Main | 312.37% | 312.69% |
| Q900-Main  | G899*-Main | 312.69% | 300.00% |
| N228*-Main | S227-Main  | 313.14% | 315.48% |
| R164*-Side | E880-Side  | 313.72% | 552.85% |
| Q172*-Main | H171-Main  | 336.23% | 334.97% |
| I72-Main   | R71*-Main  | 338.01% | 341.26% |
| E206*-Main | G205-Main  | 340.43% | 400.00% |
| S894-Main  | N893*-Main | 349.65% | 346.95% |
| T186*-Side | L187-Main  | 359.20% | 397.00% |
| R164*-Main | V163-Main  | 366.74% | 361.24% |
| R902*-Side | E869-Side  | 380.26% | 562.74% |
| R902*-Main | G901-Main  | 384.53% | 400.00% |
| R229*-Side | E191*-Side | 388.03% | 500.00% |
| R182*-Side | E232-Main  | 389.63% | 413.49% |
| N665-Main  | R664*-Main | 392.23% | 400.00% |
| G432-Main  | E431*-Main | 399.93% | 399.90% |
| R38*-Main  | F37-Main   | 399.95% | 400.00% |
| L897-Main  | T896*-Main | 400.00% | 400.00% |
| T896*-Main | S895*-Main | 400.00% | 400.00% |
| S895*-Main | S894-Main  | 400.00% | 400.00% |
| E882*-Main | S881-Main  | 400.00% | 400.00% |
| R173-Main  | Q172*-Main | 400.00% | 400.00% |
| E27*-Main  | K26-Main   | 400.00% | 400.00% |
| Q30*-Main  | P29-Main   | 400.00% | 400.00% |
| R28-Main   | E27*-Main  | 400.00% | 400.00% |
| S23*-Main  | C22-Main   | 400.00% | 400.00% |
| I24-Main   | S23*-Main  | 400.00% | 400.00% |
| H34*-Main  | S33-Main   | 400.00% | 400.00% |
| E35*-Main  | H34*-Main  | 400.00% | 400.00% |
| K31*-Main  | Q30*-Main  | 400.00% | 400.00% |
| H32-Main   | K31*-Main  | 400.00% | 400.00% |
| I36-Main   | E35*-Main  | 400.00% | 400.00% |
| A176*-Main | A175-Main  | 400.00% | 400.00% |
| S177-Main  | A176*-Main | 400.00% | 400.00% |
| K69-Main   | K68*-Main  | 400.00% | 400.00% |
| R71*-Main  | S70-Main   | 400.00% | 400.00% |
| S227-Main  | S226*-Main | 400.00% | 400.00% |
| I207-Main  | E206*-Main | 400.00% | 400.00% |
| K17*-Main  | D16-Main   | 400.00% | 400.00% |
| K18-Main   | K17*-Main  | 400.00% | 400.00% |
| K68*-Main  | L67-Main   | 400.00% | 400.00% |
| D39-Main   | R38*-Main  | 400.00% | 400.00% |
| E230-Main  | R229*-Main | 400.00% | 400.00% |
| R182*-Main | Q181-Main  | 400.00% | 400.00% |
| A183-Main  | R182*-Main | 400.00% | 400.00% |
| L199-Main  | W198*-Main | 400.00% | 400.00% |
| S192-Main  | E191*-Main | 400.00% | 400.00% |
| E191*-Main | S190-Main  | 400.00% | 400.00% |
| W198*-Main | S197-Main  | 400.00% | 400.00% |
| S197-Main  | E196*-Main | 400.00% | 400.00% |
| E431*-Main | E430-Main  | 400.00% | 400.00% |
| R436-Main  | S435*-Main | 400.00% | 400.00% |
| S435*-Main | K434*-Main | 400.00% | 400.00% |
| K434*-Main | V433-Main  | 400.00% | 400.00% |

|            |            |         |         |
|------------|------------|---------|---------|
| S658-Main  | F657*-Main | 400.00% | 400.00% |
| I660*-Main | Q659-Main  | 400.00% | 400.00% |
| F657*-Main | K656-Main  | 400.00% | 400.00% |
| S661-Main  | I660*-Main | 400.00% | 400.00% |
| D471*-Main | E470-Main  | 400.00% | 400.00% |
| S472-Main  | D471*-Main | 400.00% | 400.00% |
| G899*-Main | G898-Main  | 400.10% | 401.00% |
| G202*-Main | V201-Main  | 400.82% | 403.30% |
| R38*-Side  | E35*-Side  | 406.17% | 385.11% |
| R229*-Side | N228*-Main | 421.29% | 512.19% |
| R164*-Side | E165*-Side | 457.75% | 489.11% |
| G883-Main  | E882*-Main | 472.74% | 561.44% |
| K20-Side   | E27*-Side  | 530.31% | 389.51% |
| P203-Side  | G202*-Main | 601.07% | 602.20% |
| K765-Side  | E206*-Side | 655.37% | 665.53% |

551 The central residues are marked by \*. Side and Main indicate whether the hydrogen bond was formed with an atom of the  
552 side chain or the main chain, respectively. Occupancies >100% indicate the formation of more than one inter-residue  
553 hydrogen bond.

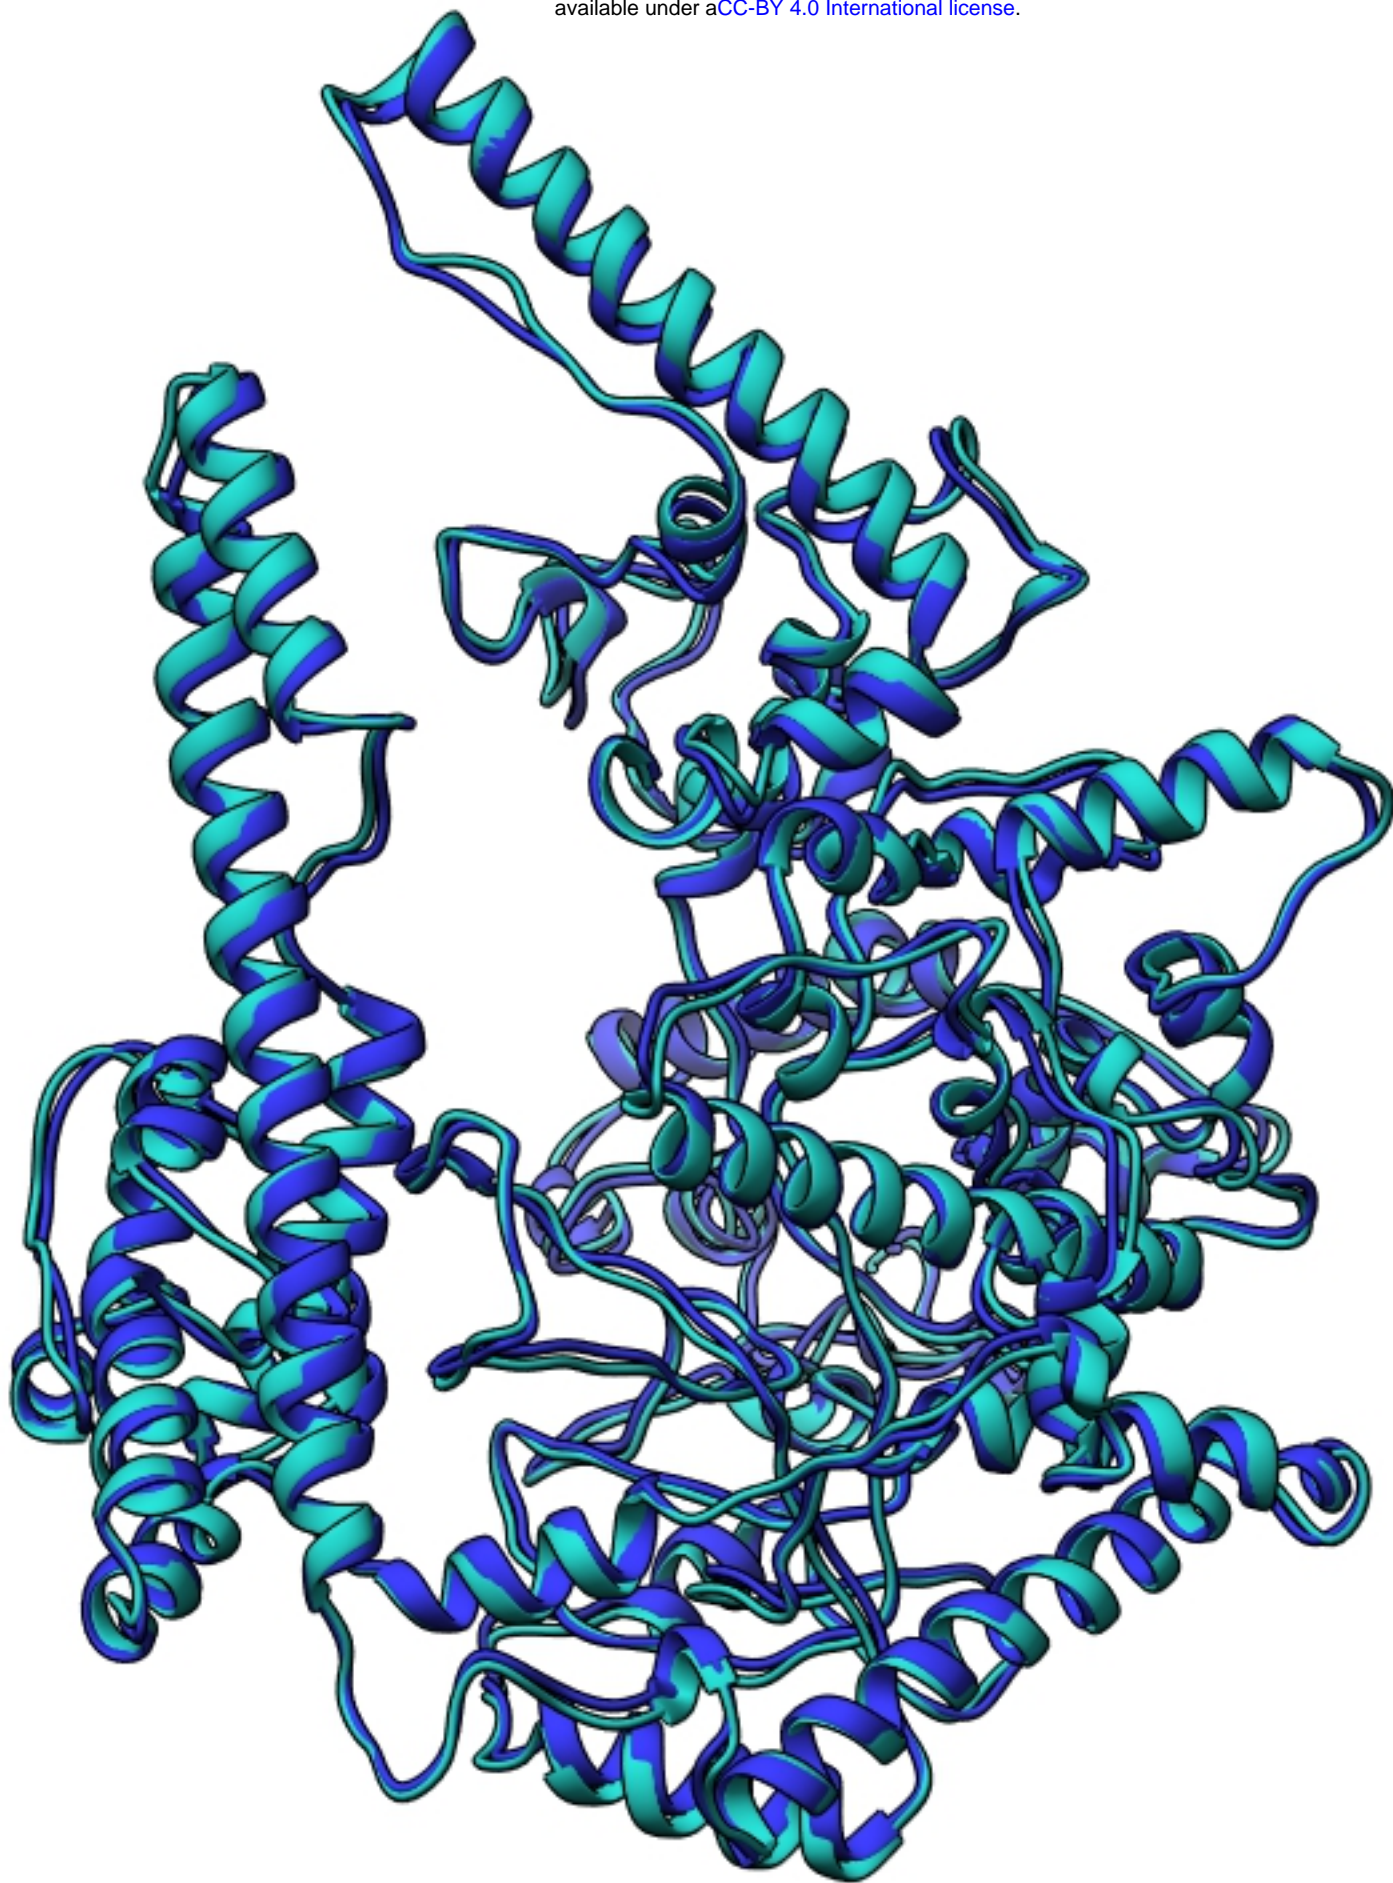

Fig 3



**A**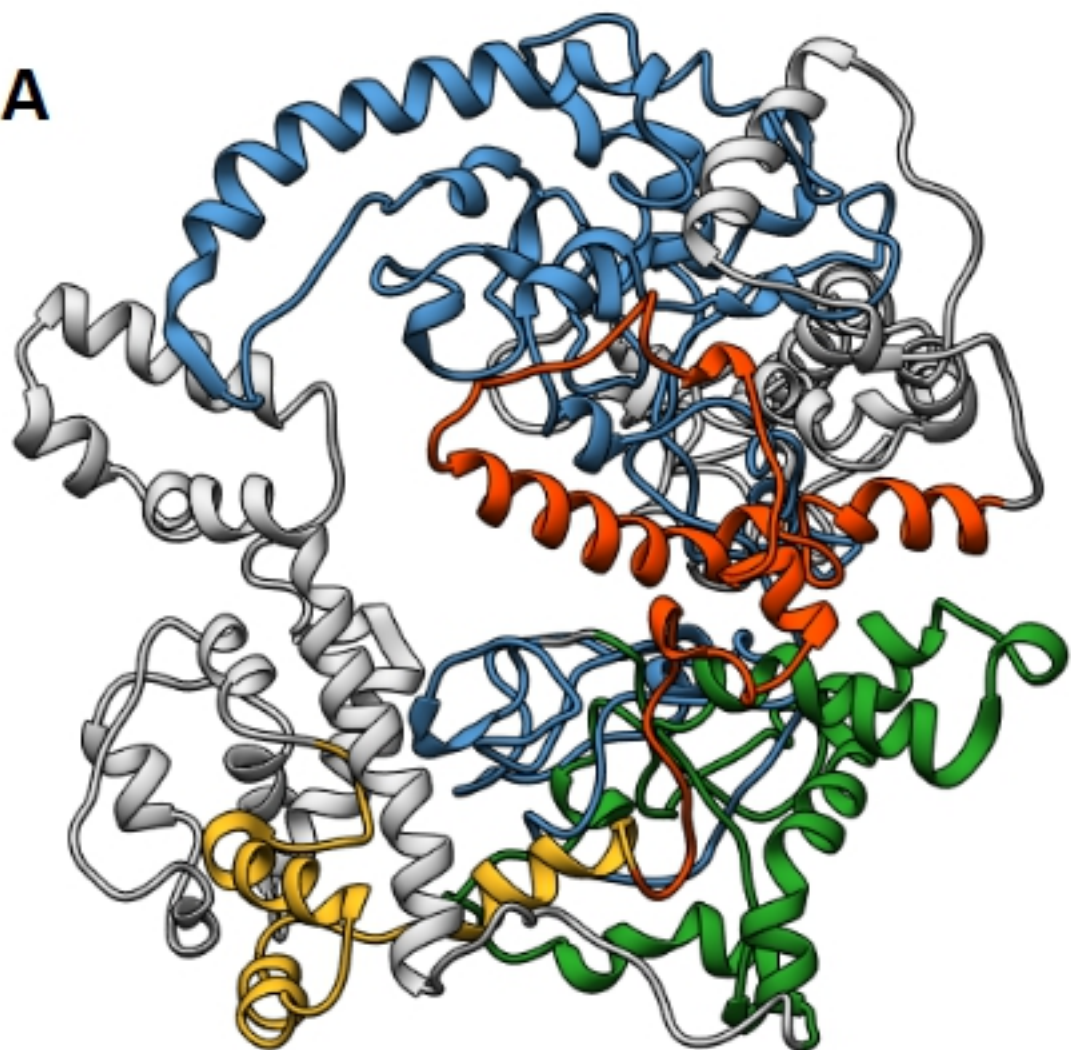**B**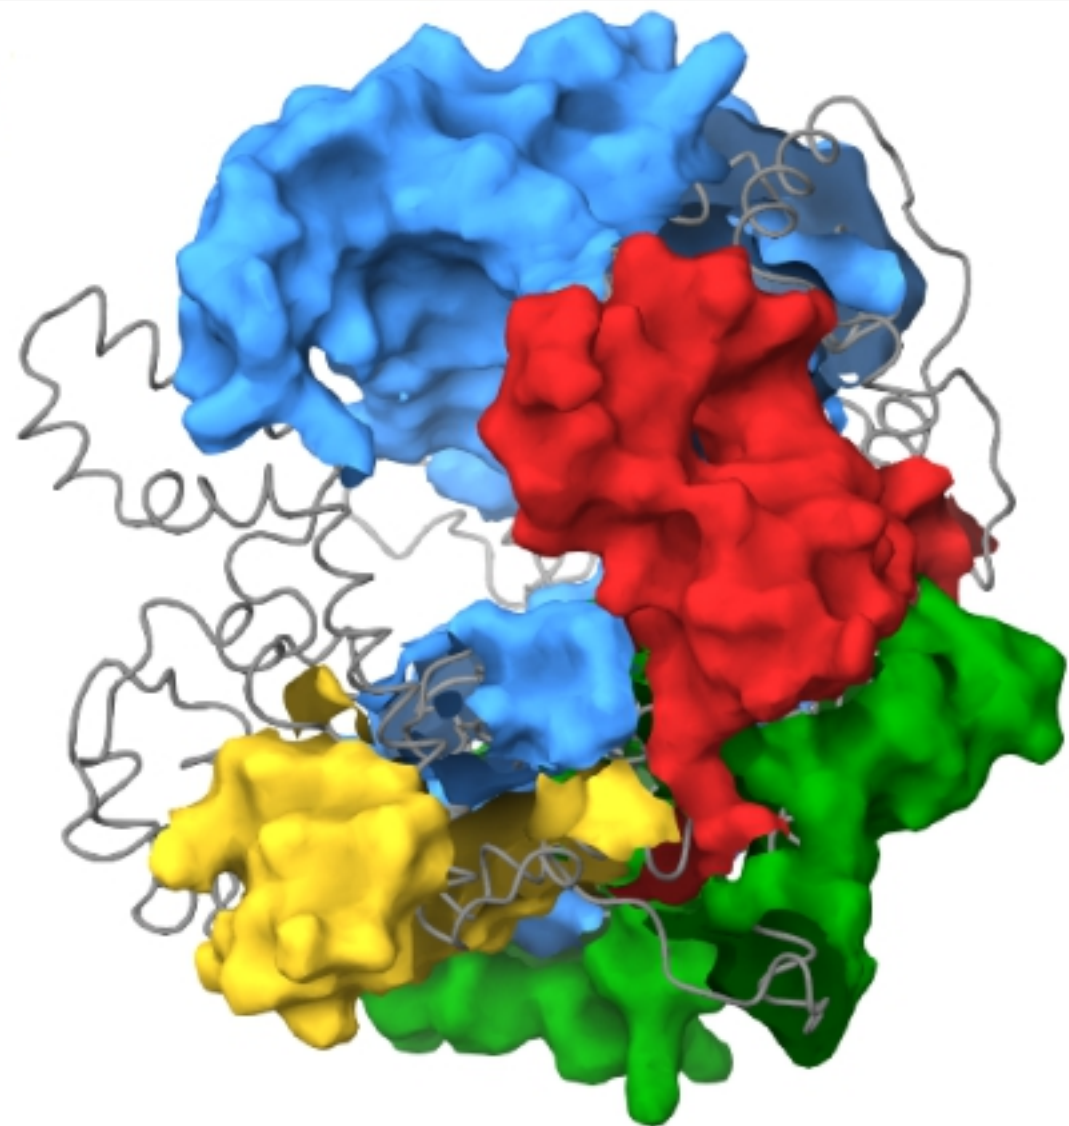**Fig 5**

# Disorder score

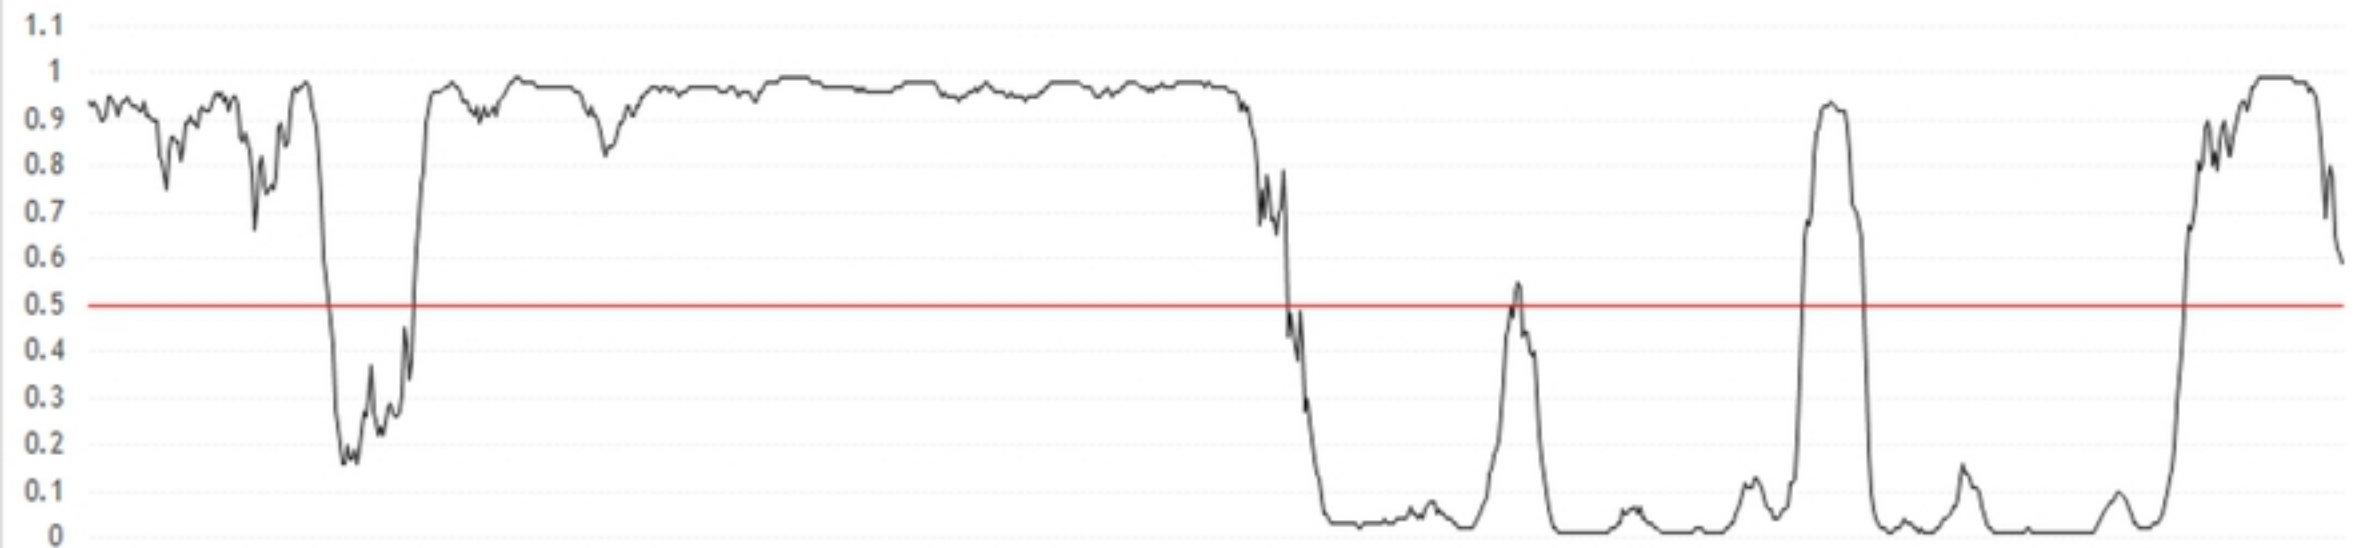

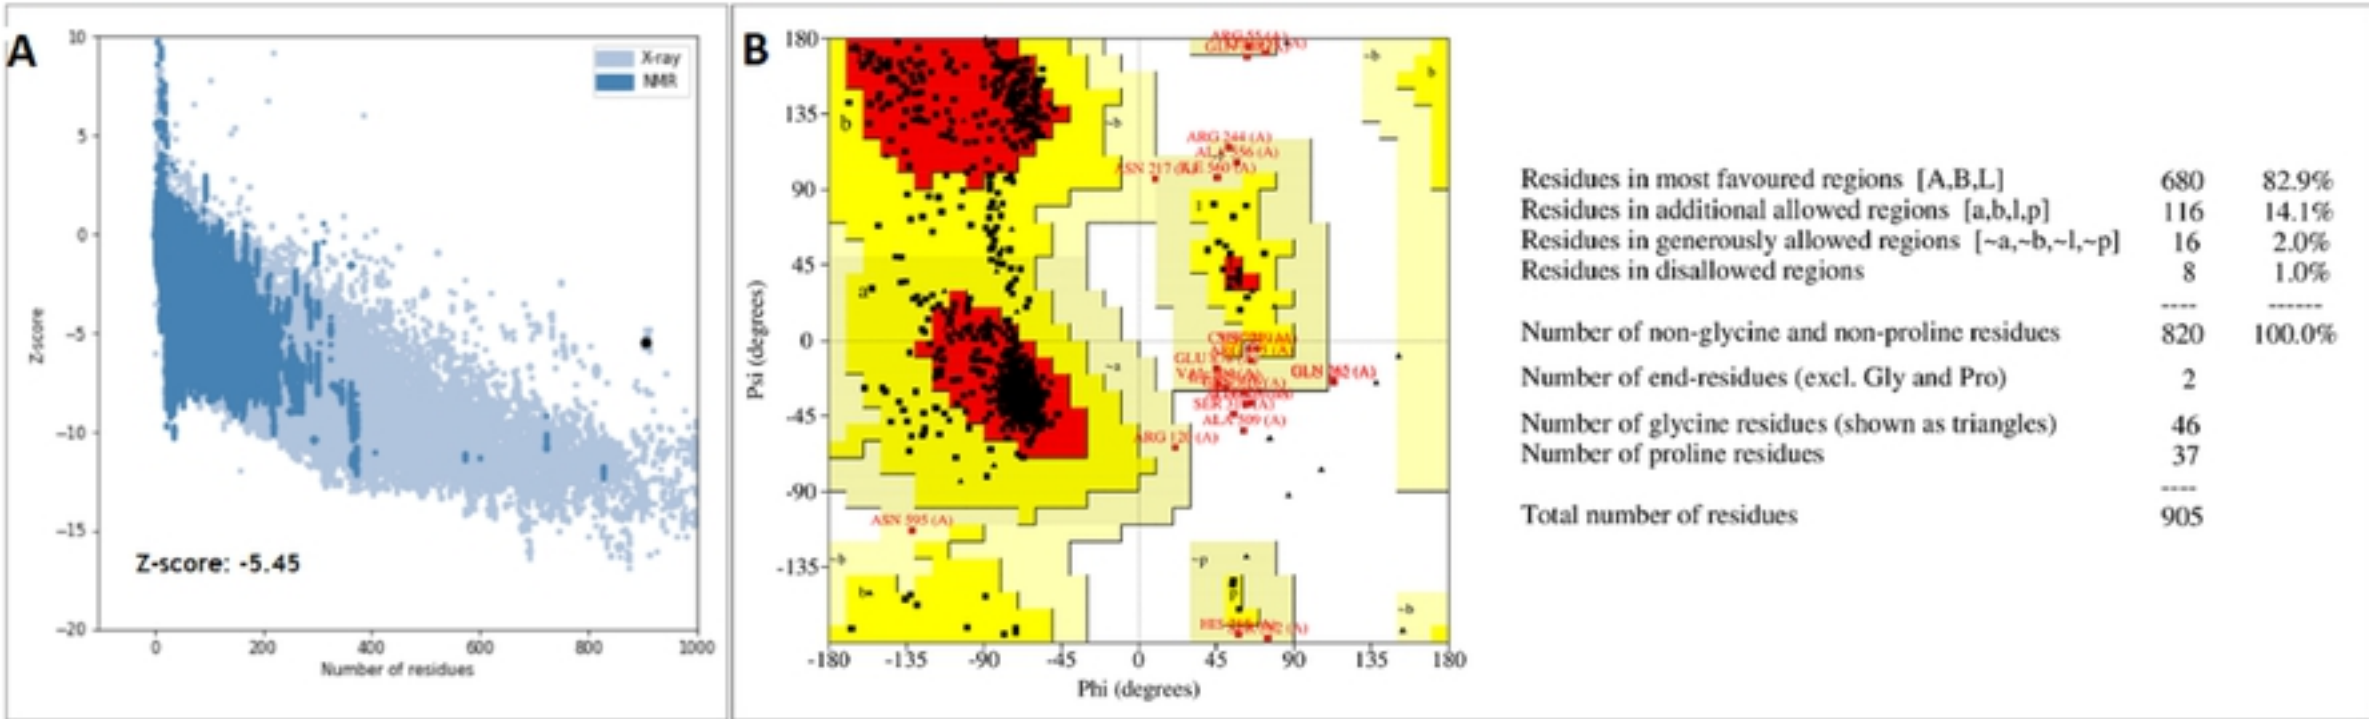

Fig 2



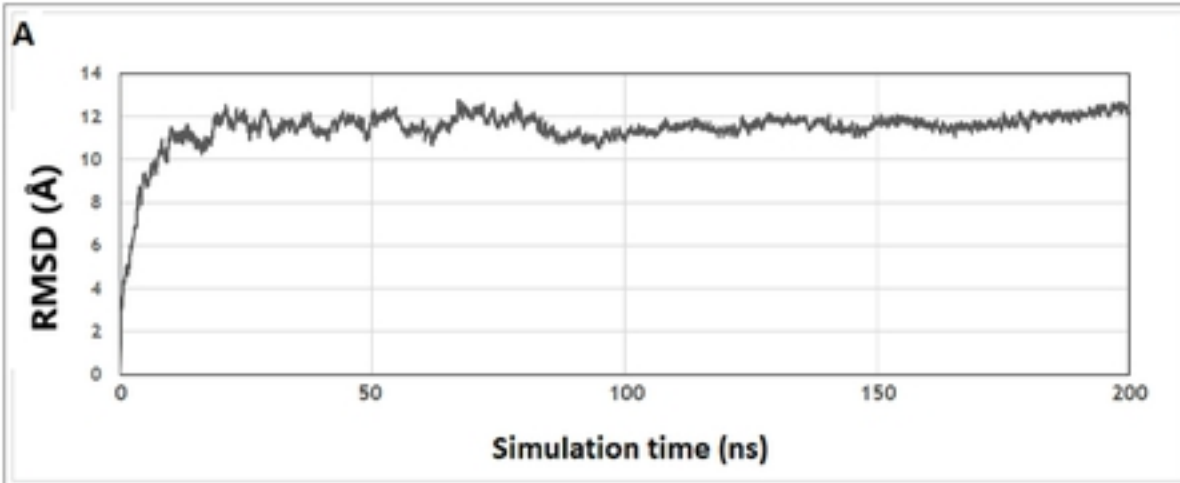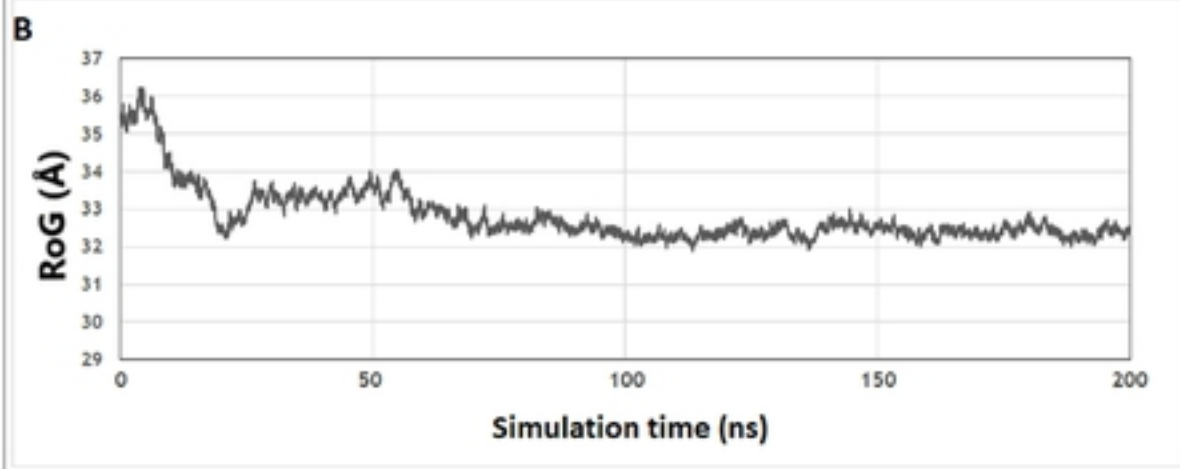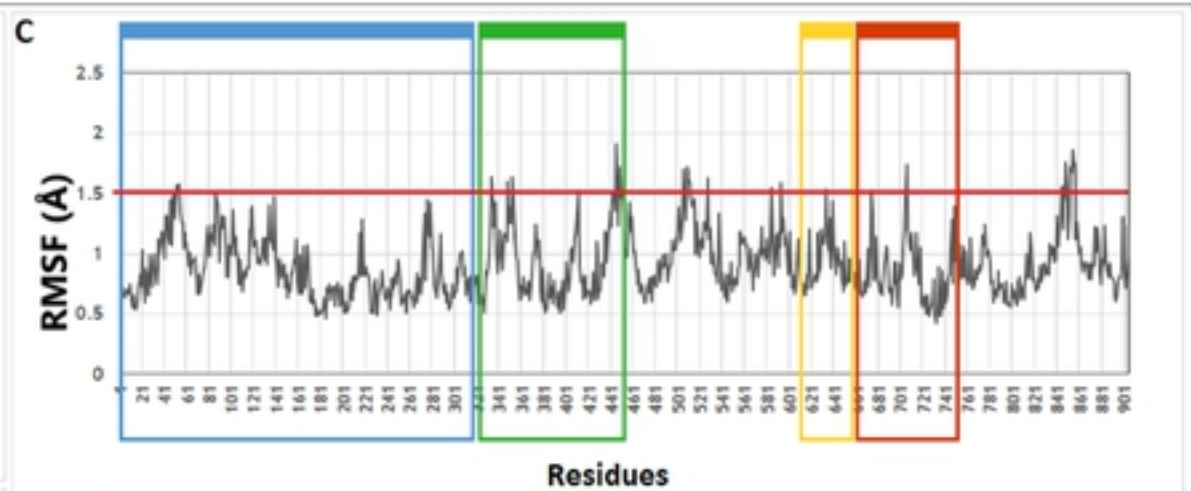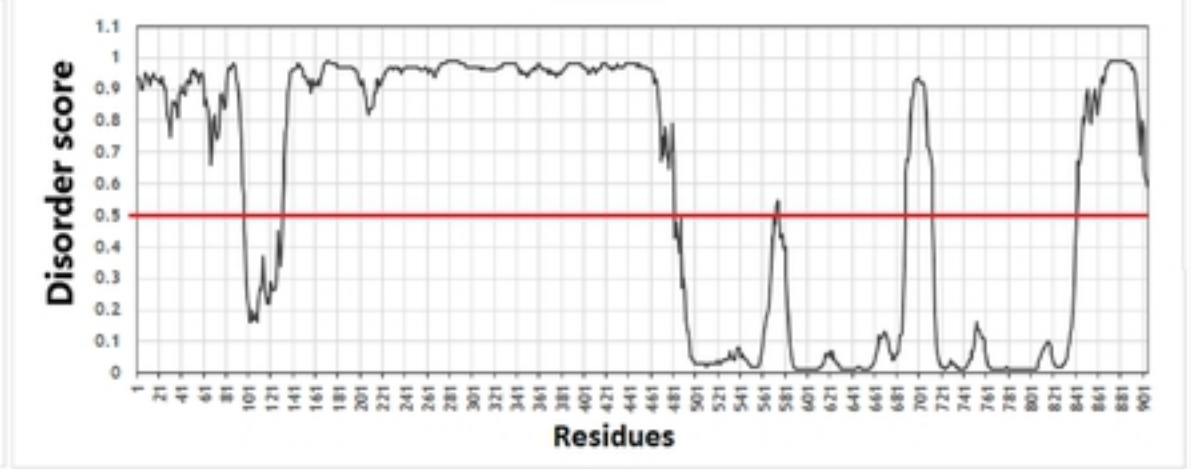

Fig 4

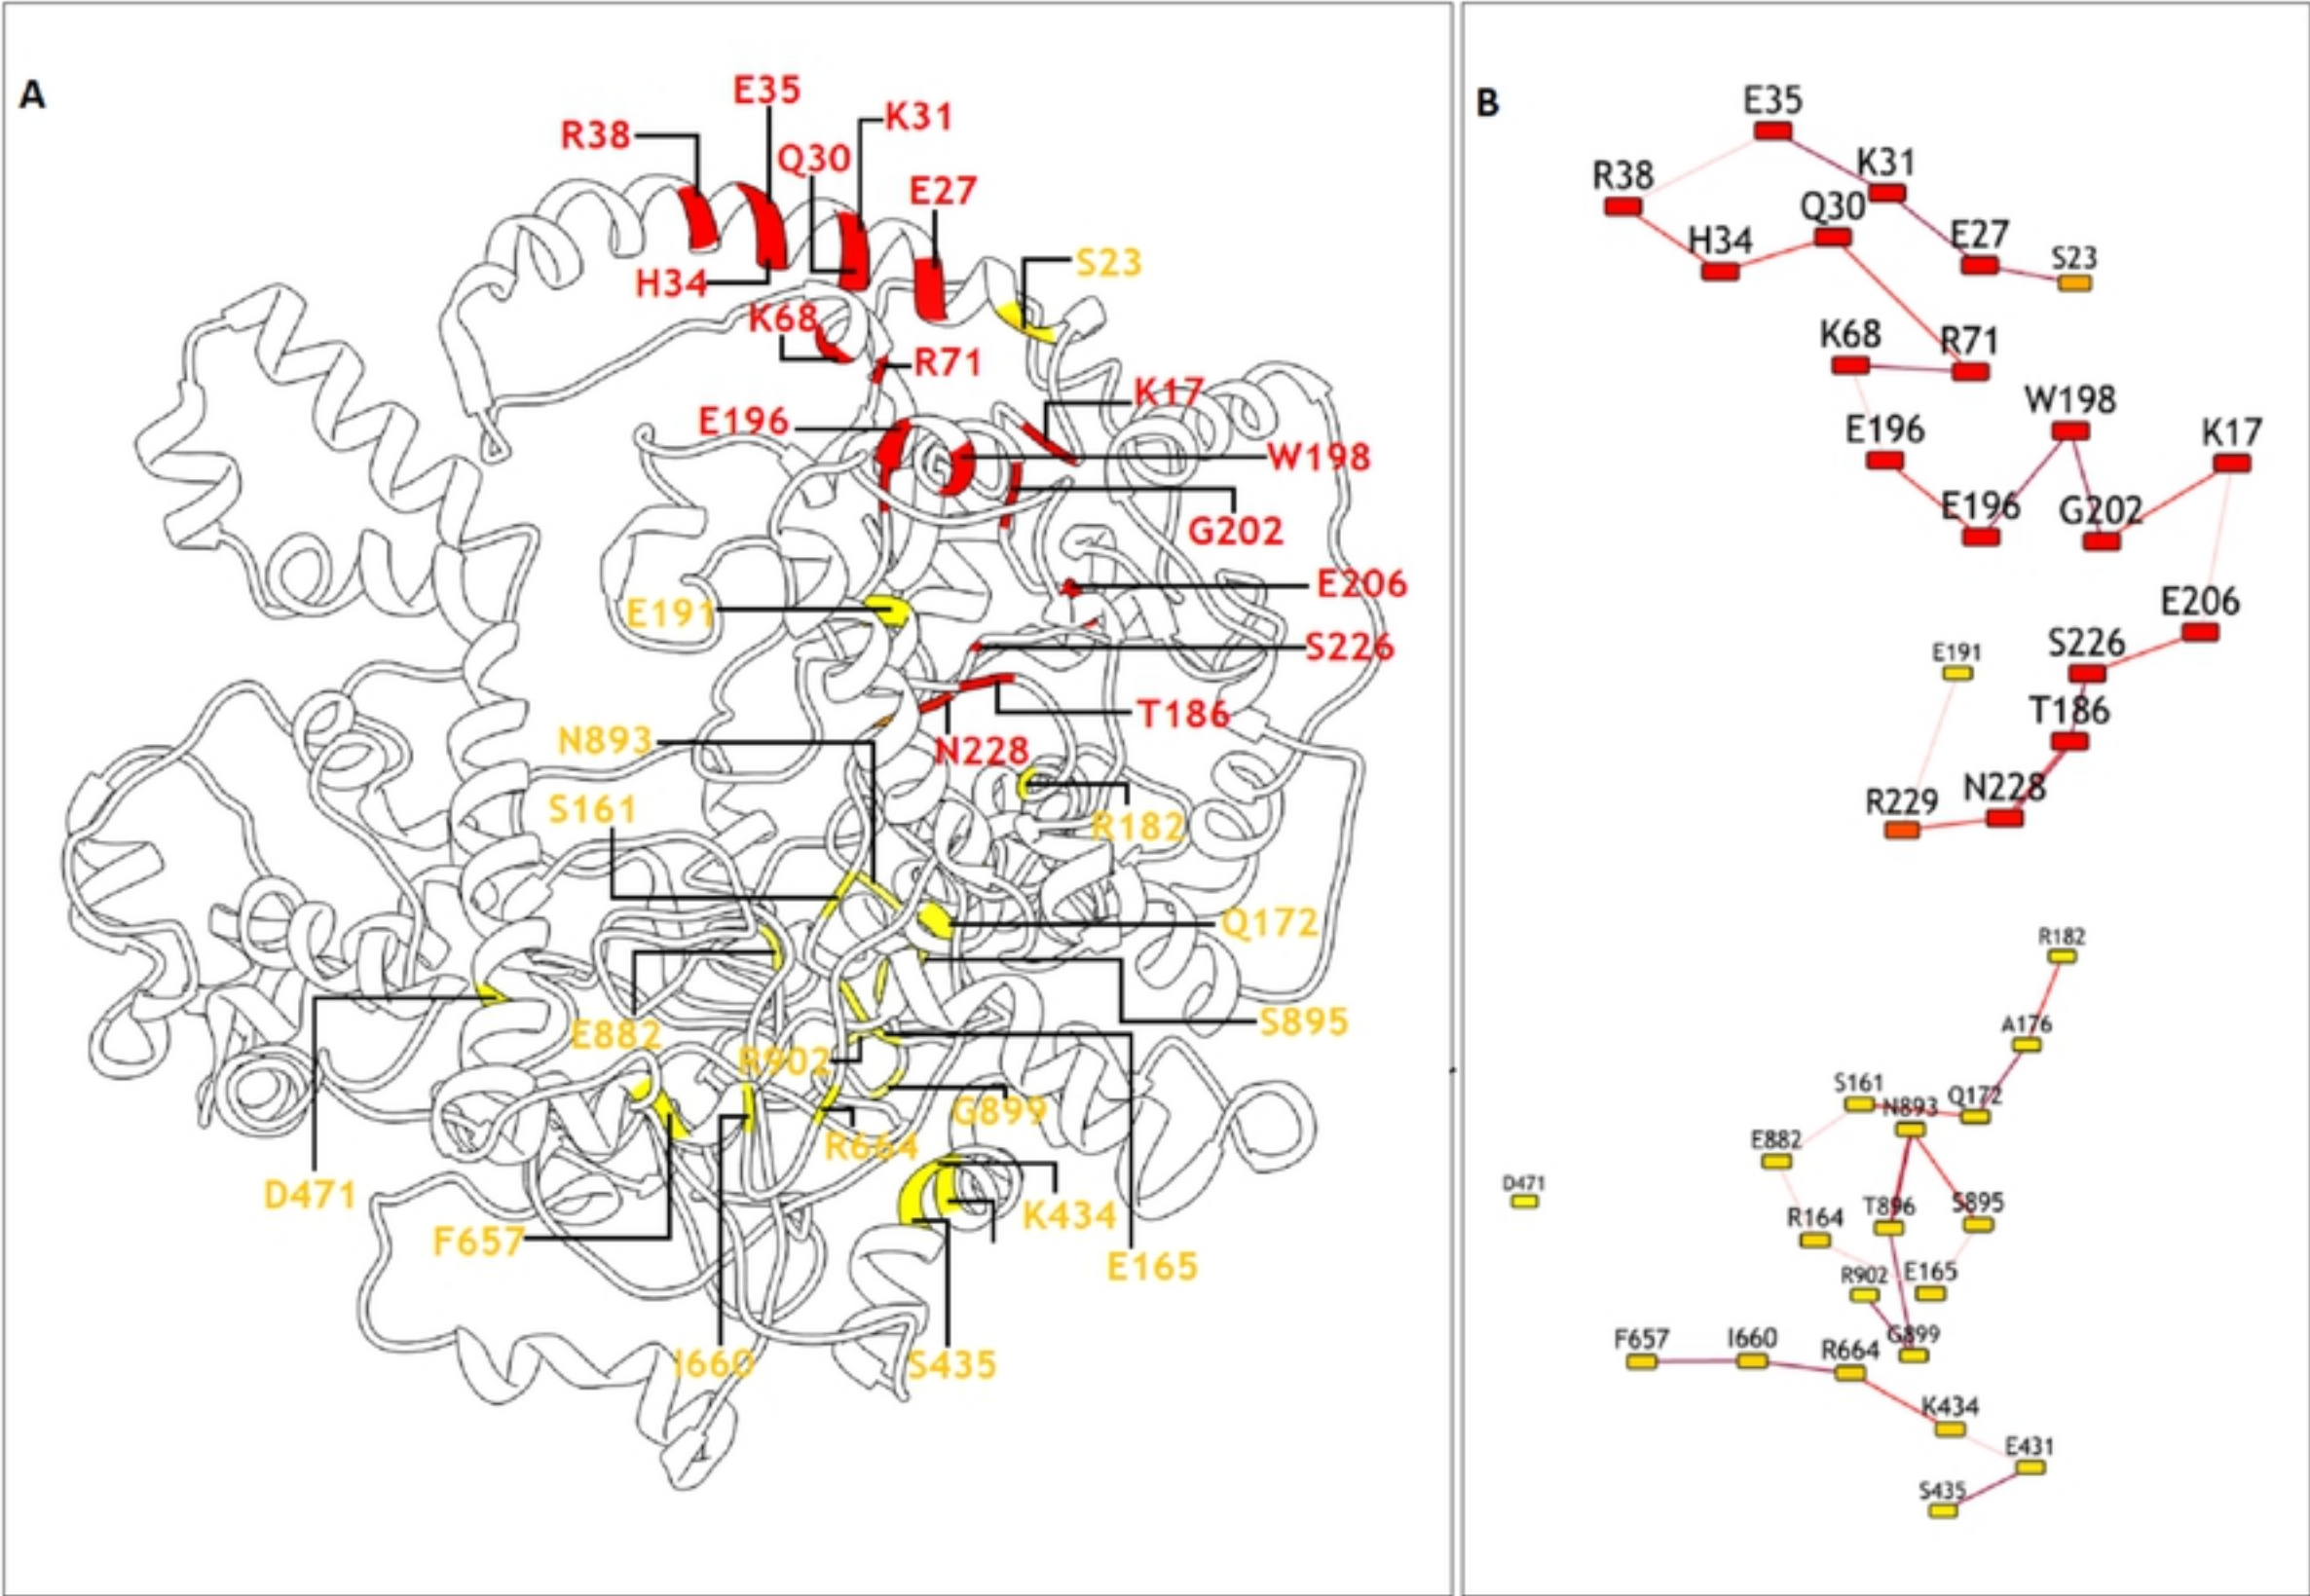

Fig 6



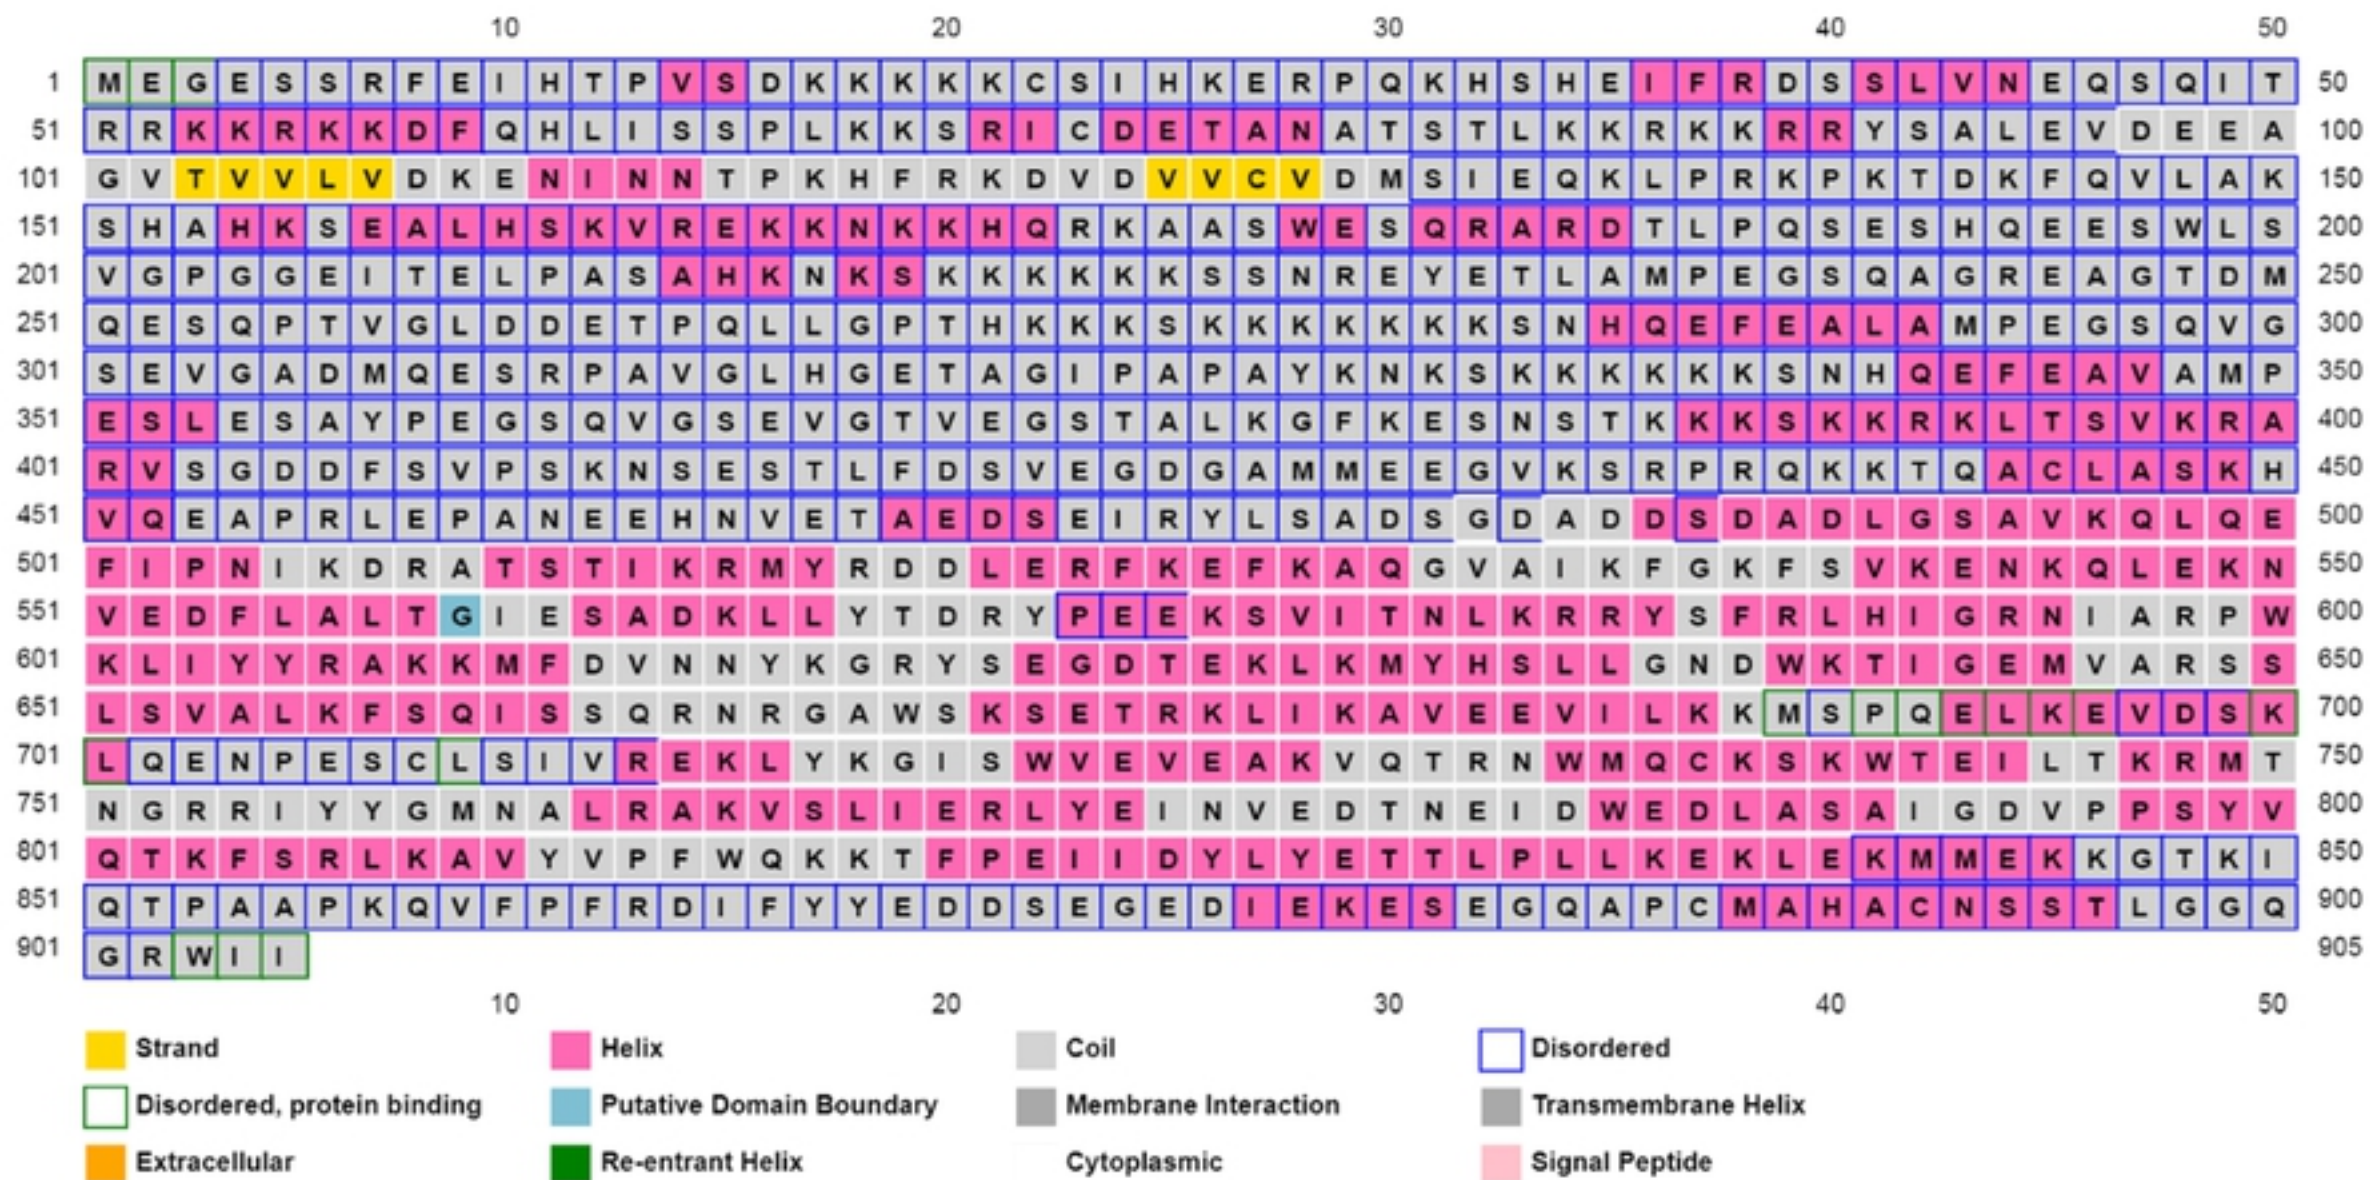

S 1 Fig

## Protein Classification

**SANT/Myb-like DNA-binding domain-containing protein** (domain architecture ID 10621698)

SANT/Myb-like DNA-binding domain-containing protein binds DNA and may function as a transcription factor

## Graphical summary

Zoom to residue level

[show extra options >](#)

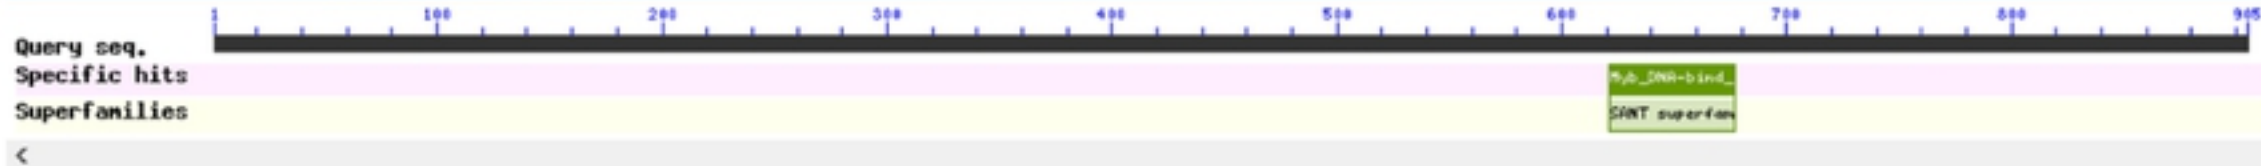

## List of domain hits

|                                     | Name           | Accession | Description                                                                                      | Interval | E-value  |
|-------------------------------------|----------------|-----------|--------------------------------------------------------------------------------------------------|----------|----------|
| <input checked="" type="checkbox"/> | Myb_DNA-bind_6 | pfam13921 | Myb-like DNA-binding domain; This family contains the DNA binding domains from Myb proteins, ... | 621-677  | 2.95e-08 |

S 2 Fig
